# Supplementary material for: Innexin function dictates the spatial relationship between distal somatic cells in the Caenorhabditis elegans gonad without impacting the germline stem cell pool
Source: eLife. 2022 Sep 13;11:e74955. doi: 10.7554/eLife.74955 (PMC9473689; doi:10.7554/eLife.74955)
Supplement: Figure 1—figure supplement 1—source data 1. [file elife-74955-fig1-figsupp1-data1.xlsx]

## Sheet: Sheet1
specimen	DTC	Sh1	mutant	CP_length	CP_count	CPmeanLength	fragments	strain	phenotype.class	CP_length.difference	CPmeanLength.difference	overlaid	perfect.overlap
DG4959_D1_001_str	qIs154	tnIs5	wt	90.892	15	49.812	103.892	DG4959	1	13	54.08	F	NA
DG4959_D1_003	qIs154	tnIs5	wt	57.958	14	41.012	74.642	DG4959	1	16.684	33.63	F
DG4959_D1_005_str	qIs154	tnIs5	wt	105.192	16	53.666	116.458	DG4959	1	11.266	62.792	F
DG4959_D1_006	qIs154	tnIs5	wt	97.175	11	60.952	79.625	DG4959	2	-17.55	18.673	F
DG4959_D1_009	qIs154	tnIs5	wt	51.458	12	28.438	46.908	DG4959	1	-4.55	18.47	F
DG4959_D1_010	qIs154	tnIs5	wt	90.242	18	39.361	67.058	DG4959	2	-23.184	27.697	F
DG4959_D1_011	qIs154	tnIs5	wt	84.608	23	39.391	115.808	DG4959	1	31.2	76.417	F
DG4959_D1_002	qIs154	tnIs5	wt	98.692	15	45.565	50.158	DG4959	2	-48.534	4.593	F
DG4959_D1_004	qIs154	tnIs5	wt	110.608	17	46.399	97.825	DG4959	2	-12.783	51.426	F
DG4977_D1_009	qIs154	tnIs5	inx14ag17	47.342	4	38.188	45.825	DG4977	2	-1.517	7.637	F
DG4977_D1_	qIs154	tnIs5	inx14ag17	44.308	5	33.432	9.642	DG4977	3	-34.666	-23.79	T
DG4977_D1_001	qIs154	tnIs5	inx14ag17	49.508	12	27.589	5.092	DG4977	3	-44.416	-22.497	T
DG4977_D1_002	qIs154	tnIs5	inx14ag17	58.175	5	44.698	12.458	DG4977	3	-45.717	-32.24	T
DG4977_D1_003	qIs154	tnIs5	inx14ag17	63.158	15	36.855	8.558	DG4977	3	-54.6	-28.297	T
DG4977_D1_004	qIs154	tnIs5	inx14ag17	116.675	9	54.708	3.142	DG4977	3	-113.533	-51.566	F
DG4977_D1_005	qIs154	tnIs5	inx14ag17	99.125	11	51.675	2.708	DG4977	3	-96.417	-48.967	T
DG4977_D1_007	qIs154	tnIs5	inx14ag17	78.758	7	43.72	11.158	DG4977	3	-67.6	-32.562	T
DG4977_D1_008	qIs154	tnIs5	inx14ag17	116.458	9	58.729	11.158	DG4977	3	-105.3	-47.571	T
DG4977_D1_010	qIs154	tnIs5	inx14ag17	79.842	13	49.258	9.642	DG4977	3	-70.2	-39.616	T
DG4977_D1_011	qIs154	tnIs5	inx14ag17	70.525	4	53.842	36.508	DG4977	3	-34.017	-17.334	F
DG4977_D1_014	qIs154	tnIs5	inx14ag17	38.458	8	22.831	-4.225	DG4977	3	-42.683	-27.056	F
DG5020_D1_002_RGB_str	naIs37	bcIs39	wt	39.542	13	23.708	48.858	DG5020	1	9.316	25.15	F
DG5020_D1_003	naIs37	bcIs39	wt	63.808	20	34.461	91.758	DG5020	1	27.95	57.297	F
DG5020_D1_004	naIs37	bcIs39	wt	73.775	20	38.534	75.292	DG5020	1	1.517	36.758	F
DG5020_D1_006	naIs37	bcIs39	wt	49.942	13	28.425	75.292	DG5020	1	25.35	46.867	F
DG5020_D1_007bf	naIs37	bcIs39	wt	44.308	21	23.777	52.542	DG5020	1	8.234	28.765	F
DG5020_D1_008f	naIs37	bcIs39	wt	53.408	17	25.038	36.508	DG5020	1	-16.9	11.47	F
DG5020_D1_010f	naIs37	bcIs39	wt	58.392	19	32.129	60.558	DG5020	1	2.166	28.429	F
DG5020_D1_011f	naIs37	bcIs39	wt	49.942	21	25.809	122.308	DG5020	1	72.366	96.499	F
DG5020_D1_012f	naIs37	bcIs39	wt	35.642	9	24.327	55.142	DG5020	1	19.5	30.815	F
DG5020_D1_014	naIs37	bcIs39	wt	40.192	10	22.512	32.175	DG5020	1	-8.017	9.663	F
DG5020_D1_016	naIs37	bcIs39	wt	45.608	18	31.188	50.592	DG5020	1	4.984	19.404	F
DG5020_D1_017	naIs37	bcIs39	wt	48.858	17	26.07	62.942	DG5020	1	14.084	36.872	F
DG5020_D1_018	naIs37	bcIs39	wt	25.025	6	18.272	62.725	DG5020	1	37.7	44.453	F
DG5020_D1_019	naIs37	bcIs39	wt	37.592	13	21.125	107.575	DG5020	1	69.983	86.45	F
DG5020_D1_020	naIs37	bcIs39	wt	53.408	18	24.158	34.775	DG5020	2	-18.633	10.617	F
DG5020_D1_021	naIs37	bcIs39	wt	54.925	14	26.155	57.525	DG5020	1	2.6	31.37	F
DG5020_D1_022	naIs37	bcIs39	wt	50.375	15	29.488	44.958	DG5020	1	-5.417	15.47	F
DG5020_D1_027	naIs37	bcIs39	wt	52.758	18	23.641	71.608	DG5020	1	18.85	47.967	F
DG5020_D1_029	naIs37	bcIs39	wt	49.725	15	34.529	86.558	DG5020	1	36.833	52.029	F
DG5020_D1_030	naIs37	bcIs39	wt	33.258	9	20.331	68.792	DG5020	1	35.534	48.461	F
DG5020_D1_001	naIs37	bcIs39	wt	37.592	13	18.575	35.642	DG5020	2	-1.95	17.067	T
DG5020_D1_005_str	naIs37	bcIs39	wt	48.642	16	27.097	37.592	DG5020	2	-11.05	10.495	F
DG5020_D1_013f	naIs37	bcIs39	wt	49.292	12	31.417	35.425	DG5020	2	-13.867	4.008	F
DG5020_D1_015	naIs37	bcIs39	wt	51.892	17	27.854	46.042	DG5020	2	-5.85	18.188	T
DG5020_D1_023	naIs37	bcIs39	wt	55.358	9	37.134	33.475	DG5020	2	-21.883	-3.659	F
DG5020_D1_024	naIs37	bcIs39	wt	59.908	17	38.56	43.225	DG5020	2	-16.683	4.665	F
DG5020_D1_026	naIs37	bcIs39	wt	54.275	27	26.429	37.375	DG5020	2	-16.9	10.946	F
DG5026_D1_	naIs37	bcIs39	inx14ag17	46.475	7	34.93	15.708	DG5026	3	-30.767	-19.222	T
DG5026_D1_001	naIs37	bcIs39	inx14ag17	44.525	6	37.447	12.675	DG5026	3	-31.85	-24.772	T
DG5026_D1_002	naIs37	bcIs39	inx14ag17	71.608	4	49.779	9.425	DG5026	3	-62.183	-40.354	T
DG5026_D1_003	naIs37	bcIs39	inx14ag17	34.342	6	25.856	9.208	DG5026	3	-25.134	-16.648	T
DG5026_D1_004f	naIs37	bcIs39	inx14ag17	37.592	6	30.369	10.725	DG5026	3	-26.867	-19.644	T
DG5026_D1_005_str	naIs37	bcIs39	inx14ag17	45.175	8	29.06	6.392	DG5026	3	-38.783	-22.668	T
DG5026_D1_006_str	naIs37	bcIs39	inx14ag17	51.025	9	29.527	7.908	DG5026	3	-43.117	-21.619	F
DG5026_D1_007_str	naIs37	bcIs39	inx14ag17	72.908	8	40.95	15.708	DG5026	3	-57.2	-25.242	F
DG5026_D1_008	naIs37	bcIs39	inx14ag17	36.075	7	22.611	15.275	DG5026	3	-20.8	-7.336	T
DG5310_L4p24_004	naIs37	tnEx42	acy4ok1806	57.092	7	33.754	90.675	DG5310	1	33.583	56.921	F
DG5310_L4p24_005	naIs37	tnEx42	acy4ok1806	53.192	6	32.067	70.418	DG5310	1	17.226	38.351	F
DG5310_L4p24_010	naIs37	tnEx42	acy4ok1806	39.975	5	21.905	35.208	DG5310	2	-4.767	13.303	F
DG5310_L4p24_012	naIs37	tnEx42	acy4ok1806	24.808	5	18.698	77.458	DG5310	1	52.65	58.76	F
DG5310_L4p24_015	naIs37	tnEx42	acy4ok1806	15.275	3	13.108	42.142	DG5310	1	26.867	29.034	F
DG5310_L4p24_017	naIs37	tnEx42	acy4ok1806	32.175	4	24.213	41.925	DG5310	1	9.75	17.712	F
DG5310_L4p24_018	naIs37	tnEx42	acy4ok1806	26.758	5	21.038	46.475	DG5310	1	19.717	25.437	F
DG5310_L4p24_007	naIs37	tnEx42	acy4ok1806	34.125	6	18.633	36.292	DG5310	2	2.167	17.659	F
DG5310_L4p24_008	naIs37	tnEx42	acy4ok1806	24.808	4	17.604	30.225	DG5310	2	5.417	12.621	F
DG5310_L4p24_009	naIs37	tnEx42	acy4ok1806	75.942	13	34.042	48.642	DG5310	2	-27.3	14.6	F
DG5310_L4p24_011	naIs37	tnEx42	acy4ok1806	57.308	13	32.225	62.292	DG5310	2	4.984	30.067	F
DG5310_L4p24_016	naIs37	tnEx42	acy4ok1806	55.358	9	30.418	61.208	DG5310	2	5.85	30.79	F
DG5320_L4p24_001	naIs37	fasn1GFP	wt	37.808	11	26.246	66.192	DG5320	1	28.384	39.946	F
DG5320_L4p24_001	naIs37	fasn1GFP	wt	37.808	11	26.246	66.192	DG5320	1	28.384	39.946	F
DG5320_L4p24_003	naIs37	fasn1GFP	wt	35.969	8	28.979	51.675	DG5320	1	15.706	22.696	F
DG5320_L4p24_004	naIs37	fasn1GFP	wt	22.858	2	22.533	60.992	DG5320	1	38.134	38.459	F
DG5320_L4p24_005	naIs37	fasn1GFP	wt	67.925	16	33.15	85.042	DG5320	1	17.117	51.892	F
DG5320_L4p24_006	naIs37	fasn1GFP	wt	19.392	2	16.142	63.808	DG5320	1	44.416	47.666	F
DG5320_L4p24_007	naIs37	fasn1GFP	wt	32.608	12	21.613	56.658	DG5320	1	24.05	35.045	F
DG5320_L4p24_008	naIs37	fasn1GFP	wt	49.075	11	29.319	82.008	DG5320	1	32.933	52.689	F
DG5320_L4p24_009_str	naIs37	fasn1GFP	wt	52.758	5	33.952	79.192	DG5320	1	26.434	45.24	F
DG5320_L4p24_010	naIs37	fasn1GFP	wt	30.442	2	24.592	11.592	DG5320	1	-18.85	-13	T
DG5320_L4p24_011	naIs37	fasn1GFP	wt	31.742	8	20.015	107.792	DG5320	1	76.05	87.777	F
DG5320_L4p24_012	naIs37	fasn1GFP	wt	21.992	1	21.992	9.858	DG5320	1	-12.134	-12.134	F
DG5320_L4p24_013	naIs37	fasn1GFP	wt	32.392	12	16.124	86.125	DG5320	1	53.733	70.001	F
DG5320_L4p24_014	naIs37	fasn1GFP	wt	27.192	7	20.011	50.158	DG5320	1	22.966	30.147	F
DG5320_L4p24_016	naIs37	fasn1GFP	wt	40.408	16	28.194	79.842	DG5320	1	39.434	51.648	F
DG5320_L4p24_017	naIs37	fasn1GFP	wt	45.175	9	24.471	73.775	DG5320	1	28.6	49.304	F
DG5320_L4p24_018	naIs37	fasn1GFP	wt	33.258	3	22.208	72.692	DG5320	1	39.434	50.484	F
DG5320_L4p24_019	naIs37	fasn1GFP	wt	43.008	7	20.908	65.758	DG5320	1	22.75	44.85	F
DG5320_L4p24_020	naIs37	fasn1GFP	wt	38.242	13	23.258	95.875	DG5320	1	57.633	72.617	F
DG5320_L4p24_002	naIs37	fasn1GFP	wt	24.592	5	15.188	33.475	DG5320	2	8.883	18.287	F
DG5320_L4p24_015	naIs37	fasn1GFP	wt	49.942	9	34.462	49.725	DG5320	2	-0.217	15.263	F
DG5367_L4p24_f	naIs37	fasn1GFP	wt	41.925	3	28.131	2.492	DG5367	3	-39.433	-25.639
DG5367_L4p24_021f	naIs37	fasn1GFP	wt	34.342	3	29.792	15.275	DG5367	3	-19.067	-14.517
DG5367_L4p24_020f	naIs37	fasn1GFP	wt	35.208	6	24.375	5.958	DG5367	3	-29.25	-18.417
DG5367_L4p24_001f	naIs37	fasn1GFP	wt	36.508	3	26.253	7.908	DG5367	3	-28.6	-18.345
DG5367_L4p24_019f	naIs37	fasn1GFP	wt	33.692	3	27.047	8.775	DG5367	3	-24.917	-18.272
DG5367_L4p24_018f	naIs37	fasn1GFP	wt	21.125	6	18.597	6.175	DG5367	3	-14.95	-12.422
DG5367_L4p24_017f	naIs37	fasn1GFP	wt	34.125	7	22.735	13.108	DG5367	3	-21.017	-9.627
DG5367_L4p24_016f	naIs37	fasn1GFP	wt	20.692	4	18.688	17.875	DG5367	3	-2.817	-0.813
DG5367_L4p24_015f	naIs37	fasn1GFP	wt	27.625	4	20.963	6.392	DG5367	3	-21.233	-14.571
DG5367_L4p24_014f	naIs37	fasn1GFP	wt	30.225	2	28.167	17.875	DG5367	3	-12.35	-10.292
DG5367_L4p24_013f	naIs37	fasn1GFP	wt	43.008	5	33.475	11.808	DG5367	3	-31.2	-21.667
DG5367_L4p24_012f	naIs37	fasn1GFP	wt	39.758	3	31.019	15.492	DG5367	3	-24.266	-15.527
DG5367_L4p24_011f	naIs37	fasn1GFP	wt	39.108	9	24.832	3.358	DG5367	3	-35.75	-21.474
DG5367_L4p24_009f	naIs37	fasn1GFP	wt	30.875	7	19.794	8.342	DG5367	3	-22.533	-11.452
DG5367_L4p24_008f	naIs37	fasn1GFP	wt	31.308	5	22.468	16.142	DG5367	3	-15.166	-6.326
DG5367_L4p24_007f	naIs37	fasn1GFP	wt	29.358	4	19.013	7.475	DG5367	3	-21.883	-11.538
DG5367_L4p24_006f	naIs37	fasn1GFP	wt	45.825	6	25.169	8.125	DG5367	3	-37.7	-17.044
DG5367_L4p24_005f	naIs37	fasn1GFP	wt	32.825	8	21.45	8.558	DG5367	3	-24.267	-12.892
DG5367_L4p24_004f	naIs37	fasn1GFP	wt	22.642	3	19.247	8.992	DG5367	3	-13.65	-10.255
DG5367_L4p24_003f	naIs37	fasn1GFP	wt	35.208	4	29.088	10.725	DG5367	3	-24.483	-18.363
DG5367_L4p24_002f	naIs37	fasn1GFP	wt	36.942	7	27.935	12.242	DG5367	3	-24.7	-15.693
