# Supplementary material for: Innexin function dictates the spatial relationship between distal somatic cells in the Caenorhabditis elegans gonad without impacting the germline stem cell pool
Source: eLife. 2022 Sep 13;11:e74955. doi: 10.7554/eLife.74955 (PMC9473689; doi:10.7554/eLife.74955)
Supplement: Figure 1—source data 1. [file elife-74955-fig1-data1.xlsx]

## Sheet: Sheet1
specimen	DTC	Sh1	mutant	CP_length	CP_count	CPmeanLength	fragments	strain	phenotype.class	CP_length.difference	CPmeanLength.difference	overlaid	perfect.overlap
DG5020_D1_002_RGB_str	naIs37	bcIs39	wt	39.542	13	23.708	48.858	DG5020	1	9.316	25.15	F
DG5020_D1_003	naIs37	bcIs39	wt	63.808	20	34.461	91.758	DG5020	1	27.95	57.297	F
DG5020_D1_004	naIs37	bcIs39	wt	73.775	20	38.534	75.292	DG5020	1	1.517	36.758	F
DG5020_D1_006	naIs37	bcIs39	wt	49.942	13	28.425	75.292	DG5020	1	25.35	46.867	F
DG5020_D1_007bf	naIs37	bcIs39	wt	44.308	21	23.777	52.542	DG5020	1	8.234	28.765	F
DG5020_D1_008f	naIs37	bcIs39	wt	53.408	17	25.038	36.508	DG5020	1	-16.9	11.47	F
DG5020_D1_010f	naIs37	bcIs39	wt	58.392	19	32.129	60.558	DG5020	1	2.166	28.429	F
DG5020_D1_011f	naIs37	bcIs39	wt	49.942	21	25.809	122.308	DG5020	1	72.366	96.499	F
DG5020_D1_012f	naIs37	bcIs39	wt	35.642	9	24.327	55.142	DG5020	1	19.5	30.815	F
DG5020_D1_014	naIs37	bcIs39	wt	40.192	10	22.512	32.175	DG5020	1	-8.017	9.663	F
DG5020_D1_016	naIs37	bcIs39	wt	45.608	18	31.188	50.592	DG5020	1	4.984	19.404	F
DG5020_D1_017	naIs37	bcIs39	wt	48.858	17	26.07	62.942	DG5020	1	14.084	36.872	F
DG5020_D1_018	naIs37	bcIs39	wt	25.025	6	18.272	62.725	DG5020	1	37.7	44.453	F
DG5020_D1_019	naIs37	bcIs39	wt	37.592	13	21.125	107.575	DG5020	1	69.983	86.45	F
DG5020_D1_020	naIs37	bcIs39	wt	53.408	18	24.158	34.775	DG5020	2	-18.633	10.617	F
DG5020_D1_021	naIs37	bcIs39	wt	54.925	14	26.155	57.525	DG5020	1	2.6	31.37	F
DG5020_D1_022	naIs37	bcIs39	wt	50.375	15	29.488	44.958	DG5020	1	-5.417	15.47	F
DG5020_D1_027	naIs37	bcIs39	wt	52.758	18	23.641	71.608	DG5020	1	18.85	47.967	F
DG5020_D1_029	naIs37	bcIs39	wt	49.725	15	34.529	86.558	DG5020	1	36.833	52.029	F
DG5020_D1_030	naIs37	bcIs39	wt	33.258	9	20.331	68.792	DG5020	1	35.534	48.461	F
DG5020_D1_001	naIs37	bcIs39	wt	37.592	13	18.575	35.642	DG5020	2	-1.95	17.067	T
DG5020_D1_005_str	naIs37	bcIs39	wt	48.642	16	27.097	37.592	DG5020	2	-11.05	10.495	F
DG5020_D1_013f	naIs37	bcIs39	wt	49.292	12	31.417	35.425	DG5020	2	-13.867	4.008	F
DG5020_D1_015	naIs37	bcIs39	wt	51.892	17	27.854	46.042	DG5020	2	-5.85	18.188	T
DG5020_D1_023	naIs37	bcIs39	wt	55.358	9	37.134	33.475	DG5020	2	-21.883	-3.659	F
DG5020_D1_024	naIs37	bcIs39	wt	59.908	17	38.56	43.225	DG5020	2	-16.683	4.665	F
DG5020_D1_026	naIs37	bcIs39	wt	54.275	27	26.429	37.375	DG5020	2	-16.9	10.946	F
DG5026_D1_	naIs37	bcIs39	inx14ag17	46.475	7	34.93	15.708	DG5026	3	-30.767	-19.222	T
DG5026_D1_001	naIs37	bcIs39	inx14ag17	44.525	6	37.447	12.675	DG5026	3	-31.85	-24.772	T
DG5026_D1_002	naIs37	bcIs39	inx14ag17	71.608	4	49.779	9.425	DG5026	3	-62.183	-40.354	T
DG5026_D1_003	naIs37	bcIs39	inx14ag17	34.342	6	25.856	9.208	DG5026	3	-25.134	-16.648	T
DG5026_D1_004f	naIs37	bcIs39	inx14ag17	37.592	6	30.369	10.725	DG5026	3	-26.867	-19.644	T
DG5026_D1_005_str	naIs37	bcIs39	inx14ag17	45.175	8	29.06	6.392	DG5026	3	-38.783	-22.668	T
DG5026_D1_006_str	naIs37	bcIs39	inx14ag17	51.025	9	29.527	7.908	DG5026	3	-43.117	-21.619	F
DG5026_D1_007_str	naIs37	bcIs39	inx14ag17	72.908	8	40.95	15.708	DG5026	3	-57.2	-25.242	F
DG5026_D1_008	naIs37	bcIs39	inx14ag17	36.075	7	22.611	15.275	DG5026	3	-20.8	-7.336	T
DG5029_L4p224_012	naIs37	bcIs39	inx8rf	43.658	4	24.267	51.892	DG5029	1	8.234	27.625	F
DG5029_L4p224_001	naIs37	bcIs39	inx8rf	35.208	1	35.208	3.792	DG5029	3	-31.416	-31.416	T
DG5029_L4p224_002	naIs37	bcIs39	inx8rf	35.858	3	21.053	3.358	DG5029	3	-32.5	-17.695	T
DG5029_L4p224_003	naIs37	bcIs39	inx8rf	25.025	4	20.8	9.208	DG5029	3	-15.817	-11.592	F
DG5029_L4p224_004	naIs37	bcIs39	inx8rf	30.658	7	20.32	7.692	DG5029	3	-22.966	-12.628	T
DG5029_L4p224_005	naIs37	bcIs39	inx8rf	26.758	4	22.75	0.108	DG5029	3	-26.65	-22.642	F
DG5029_L4p224_007	naIs37	bcIs39	inx8rf	48.425	7	28.12	10.292	DG5029	3	-38.133	-17.828	T
DG5029_L4p224_008	naIs37	bcIs39	inx8rf	19.392	3	17.442	4.442	DG5029	3	-14.95	-13	F
DG5029_L4p224_010	naIs37	bcIs39	inx8rf	24.158	6	20.186	9.642	DG5029	3	-14.516	-10.544	F
DG5029_L4p224_011	naIs37	bcIs39	inx8rf	41.058	7	26.077	7.258	DG5029	3	-33.8	-18.819	F
DG5029_L4p224_013	naIs37	bcIs39	inx8rf	36.292	7	24.251	10.508	DG5029	3	-25.784	-13.743
DG5029_L4p224_014	naIs37	bcIs39	inx8rf	36.292	2	33.367	8.992	DG5029	3	-27.3	-24.375
DG5029_L4p224_015	naIs37	bcIs39	inx8rf	5.308	1	5.308	2.275	DG5029	3	-3.033	-3.033
DG5029_L4p224_017	naIs37	bcIs39	inx8rf	27.625	1	27.625	1.192	DG5029	3	-26.433	-26.433
DG5029_L4p224_020	naIs37	bcIs39	inx8rf	18.092	1	18.092	5.742	DG5029	3	-12.35	-12.35
