# Supplementary material for: Innexin function dictates the spatial relationship between distal somatic cells in the Caenorhabditis elegans gonad without impacting the germline stem cell pool
Source: eLife. 2022 Sep 13;11:e74955. doi: 10.7554/eLife.74955 (PMC9473689; doi:10.7554/eLife.74955)
Supplement: Figure 2—figure supplement 2—source data 1. [file elife-74955-fig2-figsupp2-data1.xlsx]

## Sheet: Sheet1
specimen	DTC	Sh1	mutant	CP_length	CP_count	CPmeanLength	fragments	strain	phenotype.class	CP_length.difference	CPmeanLength.difference	overlaid	perfect.overlap
DG5020_D1_002_RGB_str	naIs37	bcIs39	wt	39.542	13	23.708	48.858	DG5020	1	9.316	25.15	F
DG5020_D1_003	naIs37	bcIs39	wt	63.808	20	34.461	91.758	DG5020	1	27.95	57.297	F
DG5020_D1_004	naIs37	bcIs39	wt	73.775	20	38.534	75.292	DG5020	1	1.517	36.758	F
DG5020_D1_006	naIs37	bcIs39	wt	49.942	13	28.425	75.292	DG5020	1	25.35	46.867	F
DG5020_D1_007bf	naIs37	bcIs39	wt	44.308	21	23.777	52.542	DG5020	1	8.234	28.765	F
DG5020_D1_008f	naIs37	bcIs39	wt	53.408	17	25.038	36.508	DG5020	1	-16.9	11.47	F
DG5020_D1_010f	naIs37	bcIs39	wt	58.392	19	32.129	60.558	DG5020	1	2.166	28.429	F
DG5020_D1_011f	naIs37	bcIs39	wt	49.942	21	25.809	122.308	DG5020	1	72.366	96.499	F
DG5020_D1_012f	naIs37	bcIs39	wt	35.642	9	24.327	55.142	DG5020	1	19.5	30.815	F
DG5020_D1_014	naIs37	bcIs39	wt	40.192	10	22.512	32.175	DG5020	1	-8.017	9.663	F
DG5020_D1_016	naIs37	bcIs39	wt	45.608	18	31.188	50.592	DG5020	1	4.984	19.404	F
DG5020_D1_017	naIs37	bcIs39	wt	48.858	17	26.07	62.942	DG5020	1	14.084	36.872	F
DG5020_D1_018	naIs37	bcIs39	wt	25.025	6	18.272	62.725	DG5020	1	37.7	44.453	F
DG5020_D1_019	naIs37	bcIs39	wt	37.592	13	21.125	107.575	DG5020	1	69.983	86.45	F
DG5020_D1_020	naIs37	bcIs39	wt	53.408	18	24.158	34.775	DG5020	2	-18.633	10.617	F
DG5020_D1_021	naIs37	bcIs39	wt	54.925	14	26.155	57.525	DG5020	1	2.6	31.37	F
DG5020_D1_022	naIs37	bcIs39	wt	50.375	15	29.488	44.958	DG5020	1	-5.417	15.47	F
DG5020_D1_027	naIs37	bcIs39	wt	52.758	18	23.641	71.608	DG5020	1	18.85	47.967	F
DG5020_D1_029	naIs37	bcIs39	wt	49.725	15	34.529	86.558	DG5020	1	36.833	52.029	F
DG5020_D1_030	naIs37	bcIs39	wt	33.258	9	20.331	68.792	DG5020	1	35.534	48.461	F
DG5020_D1_001	naIs37	bcIs39	wt	37.592	13	18.575	35.642	DG5020	2	-1.95	17.067	T
DG5020_D1_005_str	naIs37	bcIs39	wt	48.642	16	27.097	37.592	DG5020	2	-11.05	10.495	F
DG5020_D1_013f	naIs37	bcIs39	wt	49.292	12	31.417	35.425	DG5020	2	-13.867	4.008	F
DG5020_D1_015	naIs37	bcIs39	wt	51.892	17	27.854	46.042	DG5020	2	-5.85	18.188	T
DG5020_D1_023	naIs37	bcIs39	wt	55.358	9	37.134	33.475	DG5020	2	-21.883	-3.659	F
DG5020_D1_024	naIs37	bcIs39	wt	59.908	17	38.56	43.225	DG5020	2	-16.683	4.665	F
DG5020_D1_026	naIs37	bcIs39	wt	54.275	27	26.429	37.375	DG5020	2	-16.9	10.946	F
DG5027_D1_001	naIs37	bcIs39	inx9ok1502	47.775	8	31.363	115.808	DG5027	1	68.033	84.445	F
DG5027_D1_002	naIs37	bcIs39	inx9ok1502	45.608	16	29.345	185.792	DG5027	1	140.184	156.447	F
DG5027_D1_003	naIs37	bcIs39	inx9ok1502	41.708	8	22.804	59.908	DG5027	1	18.2	37.104	F
DG5027_D1_004	naIs37	bcIs39	inx9ok1502	40.625	6	25.675	34.125	DG5027	2	-6.5	8.45	F
DG5027_D1_005	naIs37	bcIs39	inx9ok1502	36.942	6	29.719	57.308	DG5027	1	20.366	27.589	F
DG5027_D1_006	naIs37	bcIs39	inx9ok1502	45.608	12	24.989	109.525	DG5027	1	63.917	84.536	F
DG5027_D1_007	naIs37	bcIs39	inx9ok1502	39.325	6	26.614	61.208	DG5027	1	21.883	34.594	F
DG5027_D1_009	naIs37	bcIs39	inx9ok1502	34.125	5	26.108	55.575	DG5027	1	21.45	29.467	F
DG5027_D1_010	naIs37	bcIs39	inx9ok1502	47.342	12	29.214	116.025	DG5027	1	68.683	86.811	F
DG5027_D1_008_str	naIs37	bcIs39	inx9ok1502	47.342	9	33.258	49.292	DG5027	2	1.95	16.034	T
DG5131_007	naIs37	bcIs39	inx8qy78	43.481	8	30.875	28.097	DG5131(bcIs39)	2	-15.384	-2.778	F	TRUE
DG5131_025f	naIs37	bcIs39	inx8qy78	42.792	8	25.648	78.758	DG5131(bcIs39)	1	35.966	53.11		FALSE
DG5131_001	naIs37	bcIs39	inx8qy78	35.362	19	19.922	40.49	DG5131(bcIs39)	2	5.128	20.568	F	TRUE
DG5131_008	naIs37	bcIs39	inx8qy78	32.584	6	20.69	25.106	DG5131(bcIs39)	2	-7.478	4.416	F	TRUE
DG5131_019.f	naIs37	bcIs39	inx8qy78	45.608	12	23.472	31.092	DG5131(bcIs39)	2	-14.516	7.62		FALSE
DG5131_021f	naIs37	bcIs39	inx8qy78	46.258	13	25.258	42.142	DG5131(bcIs39)	2	-4.116	16.884		TRUE
DG5131_022f	naIs37	bcIs39	inx8qy78	56.658	14	34.342	52.975	DG5131(bcIs39)	2	-3.683	18.633		TRUE
DG5131_026f	naIs37	bcIs39	inx8qy78	42.792	5	33.345	33.475	DG5131(bcIs39)	2	-9.317	0.13		FALSE
DG5131_031f	naIs37	bcIs39	inx8qy78	55.358	13	31.175	37.808	DG5131(bcIs39)	2	-17.55	6.633		TRUE
DG5131_003	naIs37	bcIs39	inx8qy78	17.628	6	14.921	14.209	DG5131(bcIs39)	3	-3.419	-0.712	F	TRUE
DG5131_004	naIs37	bcIs39	inx8qy78	38.994	6	27.385	7.158	DG5131(bcIs39)	3	-31.836	-20.227	F	TRUE
DG5131_005	naIs37	bcIs39	inx8qy78	31.516	4	23.717	17.628	DG5131(bcIs39)	3	-13.888	-6.089	F	TRUE
DG5131_011f	naIs37	bcIs39	inx8qy78	27.029	9	16.963	15.064	DG5131(bcIs39)	3	-11.965	-1.899	F	TRUE
DG5131_012f_str	naIs37	bcIs39	inx8qy78	25.533	2	19.551	8.226	DG5131(bcIs39)	3	-17.307	-11.325	F	TRUE
DG5131_013f	naIs37	bcIs39	inx8qy78	27.029	5	20.234	17.841	DG5131(bcIs39)	3	-9.188	-2.393	F	TRUE
DG5131_015f	naIs37	bcIs39	inx8qy78	22.115	1	22.115	9.081	DG5131(bcIs39)	3	-13.034	-13.034	F	TRUE
DG5131_016f	naIs37	bcIs39	inx8qy78	15.918	2	14.636	13.354	DG5131(bcIs39)	3	-2.564	-1.282	F	TRUE
DG5131_017f	naIs37	bcIs39	inx8qy78	36.942	7	21.063	9.208	DG5131(bcIs39)	3	-27.734	-11.855		TRUE
DG5131_018f	naIs37	bcIs39	inx8qy78	20.042	2	17.117	5.308	DG5131(bcIs39)	3	-14.734	-11.809		TRUE
DG5131_020f	naIs37	bcIs39	inx8qy78	40.192	8	25.946	24.592	DG5131(bcIs39)	3	-15.6	-1.354		TRUE
DG5131_023f	naIs37	bcIs39	inx8qy78	33.042	10	16.207	10.075	DG5131(bcIs39)	3	-22.967	-6.132		TRUE
DG5131_024f	naIs37	bcIs39	inx8qy78	34.125	7	17.411	12.025	DG5131(bcIs39)	3	-22.1	-5.386		FALSE
DG5131_027f	naIs37	bcIs39	inx8qy78	35.858	8	17.469	14.842	DG5131(bcIs39)	3	-21.016	-2.627		TRUE
DG5131_028f	naIs37	bcIs39	inx8qy78	38.242	8	26.975	11.808	DG5131(bcIs39)	3	-26.434	-15.167		TRUE
DG5131_029f	naIs37	bcIs39	inx8qy78	26.758	3	17.586	0.975	DG5131(bcIs39)	3	-25.783	-16.611		TRUE
DG5131_030f	naIs37	bcIs39	inx8qy78	31.308	8	20.692	17.008	DG5131(bcIs39)	3	-14.3	-3.684		TRUE
DG5133_D1_	naIs37	bcIs39	inx8qy102inx9ok1502	40.625	10	24.57	26.325	DG5133	2	-14.3	1.755	F
DG5133_D1_001	naIs37	bcIs39	inx8qy102inx9ok1502	11.592	1	11.592	14.192	DG5133	2	2.6	2.6	F
DG5133_D1_002	naIs37	bcIs39	inx8qy102inx9ok1502	7.908	1	7.908	8.125	DG5133	2	0.217	0.217	F
DG5133_D1_011	naIs37	bcIs39	inx8qy102inx9ok1502	16.142	3	10.508	10.725	DG5133	2	-5.417	0.217	T
DG5133_D1_004	naIs37	bcIs39	inx8qy102inx9ok1502	20.042	2	15.817	11.808	DG5133	3	-8.234	-4.009	F
DG5133_D1_005	naIs37	bcIs39	inx8qy102inx9ok1502	27.842	2	27.625	3.575	DG5133	3	-24.267	-24.05	F
DG5133_D1_006	naIs37	bcIs39	inx8qy102inx9ok1502	34.125	4	21.829	8.342	DG5133	3	-25.783	-13.487	F
DG5133_D1_007	naIs37	bcIs39	inx8qy102inx9ok1502	28.058	4	20.096	7.475	DG5133	3	-20.583	-12.621	T
DG5133_D1_008	naIs37	bcIs39	inx8qy102inx9ok1502	22.858	4	19.338	7.908	DG5133	3	-14.95	-11.43	F
DG5133_D1_009	naIs37	bcIs39	inx8qy102inx9ok1502	9.208	1	9.208	2.492	DG5133	3	-6.716	-6.716	F
DG5229_D1_006_max gam0.25	naIs37	bcIs39	inx8qy78tn2031	14.192	3	13.181	47.342	DG5229	1	33.15	34.161	F
DG5229_D1_007_max gam0.25	naIs37	bcIs39	inx8qy78tn2031	18.092	3	25.964	55.358	DG5229	1	37.266	29.394	F
DG5229_D1_008_max gam0.25	naIs37	bcIs39	inx8qy78tn2031	53.408	19	30.978	43.442	DG5229	2	-9.966	12.464	T
DG5229_D1_009_max gam0.25	naIs37	bcIs39	inx8qy78tn2031	51.458	6	28.781	33.95	DG5229	2	-17.508	5.169	F
MAX_DG5229_D1_002 (RGB)	naIs37	bcIs39	inx8qy78tn2031	28.492	3	27.625	72.258	DG5229	1	43.766	44.633	F
MAX_DG5229_D1_004 (RGB)	naIs37	bcIs39	inx8qy78tn2031	18.308	5	13.498	34.342	DG5229	1	16.034	20.844	F
DG5229_D1_005_max gam0.25	naIs37	bcIs39	inx8qy78tn2031	54.058	6	21.956	59.85	DG5229	2	5.792	37.894	F
DG5229_D1_010_max gam0.25	naIs37	bcIs39	inx8qy78tn2031	61.208	17	31.117	63.808	DG5229	2	2.6	32.691	F
DG5229_D1_011_max gam0.25_str	naIs37	bcIs39	inx8qy78tn2031	44.525	7	25.489	34.33	DG5229	2	-10.195	8.841	F
MAX_DG5229_D1_003 (RGB)	naIs37	bcIs39	inx8qy78tn2031	45.392	13	22.792	32.22	DG5229	2	-13.172	9.428	F
MAX_DG5229_D1_ (RGB)_str	naIs37	bcIs39	inx8qy78tn2031	18.092	4	14.896	14.625	DG5229	3	-3.467	-0.271	F
MAX_DG5232_D1_001	naIs37	bcIs39	inx8tn2034	39.975	7	24.654	51.025	DG5232	1	11.05	26.371	F
MAX_DG5232_D1_002_str	naIs37	bcIs39	inx8tn2034	29.792	12	21.956	61.858	DG5232	1	32.066	39.902	F
MAX_DG5232_D1_008	naIs37	bcIs39	inx8tn2034	36.075	7	27.563	62.292	DG5232	1	26.217	34.729	F
MAX_DG5232_D1_009_str	naIs37	bcIs39	inx8tn2034	51.242	17	27.039	82.5	DG5232	1	31.258	55.461	F
MAX_DG5232_D1__str	naIs37	bcIs39	inx8tn2034	31.092	5	25.285	35.208	DG5232	2	4.116	9.923	F
MAX_DG5232_D1_007	naIs37	bcIs39	inx8tn2034	29.575	8	17.523	34.992	DG5232	2	5.417	17.469	F
MAX_DG5232_D1_005	naIs37	bcIs39	inx8tn2034	38.242	11	27.27	18.958	DG5232	3	-19.284	-8.312	F
MAX_DG5232_D1_006_str	naIs37	bcIs39	inx8tn2034	26.542	8	16.71	14.408	DG5232	3	-12.134	-2.302	F
DG5346_L4p24het_002f	naIs37	bcIs39	inx8qy78het	31.525	9	21.968	89.375	DG5346(bcIs39)	1	57.85	67.407		TRUE
DG5346_L4p24het_012f	naIs37	bcIs39	inx8qy78het	39.758	6	28.528	69.008	DG5346(bcIs39)	1	29.25	40.48		TRUE
DG5346_L4p24het_005f	naIs37	bcIs39	inx8qy78het	36.075	6	19.789	40.408	DG5346(bcIs39)	2	4.333	20.619		TRUE
DG5346_L4p24het_007f	naIs37	bcIs39	inx8qy78het	44.525	13	24.942	30.008	DG5346(bcIs39)	2	-14.517	5.066		FALSE
DG5346_L4p24het_010f	naIs37	bcIs39	inx8qy78het	32.392	7	17.689	88.075	DG5346(bcIs39)	2	55.683	70.386		FALSE
DG5346_L4p24het_011f	naIs37	bcIs39	inx8qy78het	63.592	13	40.025	61.425	DG5346(bcIs39)	2	-2.167	21.4		TRUE
DG5346_L4p24het_017f	naIs37	bcIs39	inx8qy78het	49.942	13	30.992	32.825	DG5346(bcIs39)	2	-17.117	1.833		TRUE
DG5346_L4p24het_018f	naIs37	bcIs39	inx8qy78het	43.008	8	30.035	69.875	DG5346(bcIs39)	2	26.867	39.84		FALSE
DG5346_L4p24het_020f	naIs37	bcIs39	inx8qy78het	43.008	13	28.342	55.358	DG5346(bcIs39)	2	12.35	27.016		TRUE
DG5346_L4p24het_020f	naIs37	bcIs39	inx8qy78het	43.008	13	28.342	55.358	DG5346(bcIs39)	2	12.35	27.016		TRUE
DG5346_L4p24het_004f	naIs37	bcIs39	inx8qy78het	25.892	5	16.965	0.542	DG5346(bcIs39)	3	-25.35	-16.423		TRUE
DG5346_L4p24het_006f	naIs37	bcIs39	inx8qy78het	32.175	7	23.323	15.058	DG5346(bcIs39)	3	-17.117	-8.265		TRUE
DG5346_L4p24het_008f	naIs37	bcIs39	inx8qy78het	50.375	12	29.34	12.675	DG5346(bcIs39)	3	-37.7	-16.665		TRUE
DG5346_L4p24het_009f	naIs37	bcIs39	inx8qy78het	35.858	6	25.206	19.608	DG5346(bcIs39)	3	-16.25	-5.598		TRUE
DG5346_L4p24het_013f	naIs37	bcIs39	inx8qy78het	52.108	14	31.401	28.058	DG5346(bcIs39)	3	-24.05	-3.343		TRUE
DG5346_L4p24het_016f	naIs37	bcIs39	inx8qy78het	11.375	1	11.375	10.942	DG5346(bcIs39)	3	-0.433	-0.433		TRUE
DG5346_L4p24het_019f	naIs37	bcIs39	inx8qy78het	28.275	8	18.552	12.025	DG5346(bcIs39)	3	-16.25	-6.527		TRUE
DG5346_L4p24het_021f	naIs37	bcIs39	inx8qy78het	64.892	11	33.79	27.408	DG5346(bcIs39)	3	-37.484	-6.382		TRUE
DG5347_L4p24het_002f	naIs37	bcIs39	inx8(qy78tn2031)het	16.792	2	14.083	57.092	DG5347	1	40.3	43.009
DG5347_L4p24het_003f	naIs37	bcIs39	inx8(qy78tn2031)het	51.242	5	26.758	54.058	DG5347	1	2.816	27.3
DG5347_L4p24het_004f	naIs37	bcIs39	inx8(qy78tn2031)het	26.108	7	21.094	33.692	DG5347	1	7.584	12.598
DG5347_L4p24het_005f	naIs37	bcIs39	inx8(qy78tn2031)het	38.242	6	25.35	87.642	DG5347	1	49.4	62.292
DG5347_L4p24het_008f	naIs37	bcIs39	inx8(qy78tn2031)het	40.408	6	27.733	71.608	DG5347	1	31.2	43.875
DG5347_L4p24het_011f	naIs37	bcIs39	inx8(qy78tn2031)het	45.608	13	32.092	57.092	DG5347	1	11.484	25
DG5347_L4p24het_012f	naIs37	bcIs39	inx8(qy78tn2031)het	28.058	8	18.119	64.025	DG5347	1	35.967	45.906
DG5347_L4p24het_014f	naIs37	bcIs39	inx8(qy78tn2031)het	36.725	12	26.289	65.542	DG5347	1	28.817	39.253
DG5347_L4p24het_016f	naIs37	bcIs39	inx8(qy78tn2031)het	31.742	4	20.15	56.442	DG5347	1	24.7	36.292
DG5347_L4p24het_017f	naIs37	bcIs39	inx8(qy78tn2031)het	39.975	7	25.613	66.408	DG5347	1	26.433	40.795
DG5347_L4p24het_018f	naIs37	bcIs39	inx8(qy78tn2031)het	49.292	13	26.325	73.775	DG5347	1	24.483	47.45
DG5347_L4p24het_019f	naIs37	bcIs39	inx8(qy78tn2031)het	36.075	7	23.044	63.375	DG5347	1	27.3	40.331
DG5347_L4p24het_f	naIs37	bcIs39	inx8(qy78tn2031)het	41.275	6	29.431	95.658	DG5347	1	54.383	66.227
DG5347_L4p24het_001f	naIs37	bcIs39	inx8(qy78tn2031)het	43.225	10	26.997	49.508	DG5347	2	6.283	22.511
DG5347_L4p24het_009f	naIs37	bcIs39	inx8(qy78tn2031)het	46.258	14	26.929	45.392	DG5347	2	-0.866	18.463
DG5347_L4p24het_013f	naIs37	bcIs39	inx8(qy78tn2031)het	41.058	8	29.304	30.225	DG5347	2	-10.833	0.921
DG5347_L4p24het_015f	naIs37	bcIs39	inx8(qy78tn2031)het	23.725	8	17.848	23.725	DG5347	2	0	5.877
DG5347_L4p24het_006f	naIs37	bcIs39	inx8(qy78tn2031)het	50.375	12	24.574	24.375	DG5347	3	-26	-0.199
DG5347_L4p24het_010f	naIs37	bcIs39	inx8(qy78tn2031)het	26.542	2	19.933	17.658	DG5347	3	-8.884	-2.275
DG5366_L4p24het_024f	naIs37	bcIs39	inx8(qy78)overNull	24.808	5	19.305	44.742	DG5366	1	19.934	25.437
DG5366_L4p24het_021f	naIs37	bcIs39	inx8(qy78)overNull	43.875	9	22.377	64.025	DG5366	1	20.15	41.648
DG5366_L4p24het_001f	naIs37	bcIs39	inx8(qy78)overNull	31.308	6	25.061	51.458	DG5366	1	20.15	26.397
DG5366_L4p24het_019f	naIs37	bcIs39	inx8(qy78)overNull	52.758	12	27.932	60.558	DG5366	1	7.8	32.626
DG5366_L4p24het_016f	naIs37	bcIs39	inx8(qy78)overNull	15.492	3	13.975	53.842	DG5366	1	38.35	39.867
DG5366_L4p24het_014f	naIs37	bcIs39	inx8(qy78)overNull	40.625	13	24.658	57.958	DG5366	1	17.333	33.3
DG5366_L4p24het_012f	naIs37	bcIs39	inx8(qy78)overNull	48.208	10	23.595	54.708	DG5366	1	6.5	31.113
DG5366_L4p24het_011f	naIs37	bcIs39	inx8(qy78)overNull	16.792	6	12.386	23.292	DG5366	1	6.5	10.906
DG5366_L4p24het_009f	naIs37	bcIs39	inx8(qy78)overNull	44.092	12	30.008	54.058	DG5366	1	9.966	24.05
DG5366_L4p24het_008f	naIs37	bcIs39	inx8(qy78)overNull	41.275	16	25.959	63.808	DG5366	1	22.533	37.849
DG5366_L4p24het_007f	naIs37	bcIs39	inx8(qy78)overNull	46.692	5	26.238	40.842	DG5366	2	-5.85	14.604
DG5366_L4p24het_f	naIs37	bcIs39	inx8(qy78)overNull	36.075	8	22.506	24.592	DG5366	2	-11.483	2.086
DG5366_L4p24het_022f	naIs37	bcIs39	inx8(qy78)overNull	36.075	12	20.872	36.725	DG5366	2	0.65	15.853
DG5366_L4p24het_020f	naIs37	bcIs39	inx8(qy78)overNull	25.242	5	17.138	28.058	DG5366	2	2.816	10.92
DG5366_L4p24het_018f	naIs37	bcIs39	inx8(qy78)overNull	45.392	10	24.548	36.725	DG5366	2	-8.667	12.177
DG5366_L4p24het_017f	naIs37	bcIs39	inx8(qy78)overNull	42.792	8	24.998	39.975	DG5366	2	-2.817	14.977
DG5366_L4p24het_013f	naIs37	bcIs39	inx8(qy78)overNull	41.058	6	24.194	33.042	DG5366	2	-8.016	8.848
DG5366_L4p24het_010f	naIs37	bcIs39	inx8(qy78)overNull	15.492	5	13.108	10.075	DG5366	2	-5.417	-3.033
DG5366_L4p24het_006f	naIs37	bcIs39	inx8(qy78)overNull	34.992	8	26.108	21.992	DG5366	2	-13	-4.116
DG5366_L4p24het_005f	naIs37	bcIs39	inx8(qy78)overNull	19.825	3	15.203	18.958	DG5366	2	-0.867	3.755
DG5366_L4p24het_004f	naIs37	bcIs39	inx8(qy78)overNull	44.525	13	21.525	34.775	DG5366	2	-9.75	13.25
DG5366_L4p24het_003f	naIs37	bcIs39	inx8(qy78)overNull	49.725	12	24.213	47.342	DG5366	2	-2.383	23.129
DG5366_L4p24het_015f	naIs37	bcIs39	inx8(qy78)overNull	18.525	1	18.525	1.408	DG5366	3	-17.117	-17.117
