# Supplementary material for: Innexin function dictates the spatial relationship between distal somatic cells in the Caenorhabditis elegans gonad without impacting the germline stem cell pool
Source: eLife. 2022 Sep 13;11:e74955. doi: 10.7554/eLife.74955 (PMC9473689; doi:10.7554/eLife.74955)
Supplement: Figure 2—figure supplement 3—source data 1. [file elife-74955-fig2-figsupp3-data1.xlsx]

## Sheet: Sheet1
specimen	DTC	Sh1	mutant	CP_length	CP_count	CPmeanLength	fragments	strain	phenotype.class	CP_length.difference	CPmeanLength.difference	overlaid	perfect.overlap
DG5020_D1_002_RGB_str	naIs37	bcIs39	wt	39.542	13	23.708	48.858	DG5020	1	9.316	25.15	F
DG5020_D1_003	naIs37	bcIs39	wt	63.808	20	34.461	91.758	DG5020	1	27.95	57.297	F
DG5020_D1_004	naIs37	bcIs39	wt	73.775	20	38.534	75.292	DG5020	1	1.517	36.758	F
DG5020_D1_006	naIs37	bcIs39	wt	49.942	13	28.425	75.292	DG5020	1	25.35	46.867	F
DG5020_D1_007bf	naIs37	bcIs39	wt	44.308	21	23.777	52.542	DG5020	1	8.234	28.765	F
DG5020_D1_008f	naIs37	bcIs39	wt	53.408	17	25.038	36.508	DG5020	1	-16.9	11.47	F
DG5020_D1_010f	naIs37	bcIs39	wt	58.392	19	32.129	60.558	DG5020	1	2.166	28.429	F
DG5020_D1_011f	naIs37	bcIs39	wt	49.942	21	25.809	122.308	DG5020	1	72.366	96.499	F
DG5020_D1_012f	naIs37	bcIs39	wt	35.642	9	24.327	55.142	DG5020	1	19.5	30.815	F
DG5020_D1_014	naIs37	bcIs39	wt	40.192	10	22.512	32.175	DG5020	1	-8.017	9.663	F
DG5020_D1_016	naIs37	bcIs39	wt	45.608	18	31.188	50.592	DG5020	1	4.984	19.404	F
DG5020_D1_017	naIs37	bcIs39	wt	48.858	17	26.07	62.942	DG5020	1	14.084	36.872	F
DG5020_D1_018	naIs37	bcIs39	wt	25.025	6	18.272	62.725	DG5020	1	37.7	44.453	F
DG5020_D1_019	naIs37	bcIs39	wt	37.592	13	21.125	107.575	DG5020	1	69.983	86.45	F
DG5020_D1_020	naIs37	bcIs39	wt	53.408	18	24.158	34.775	DG5020	2	-18.633	10.617	F
DG5020_D1_021	naIs37	bcIs39	wt	54.925	14	26.155	57.525	DG5020	1	2.6	31.37	F
DG5020_D1_022	naIs37	bcIs39	wt	50.375	15	29.488	44.958	DG5020	1	-5.417	15.47	F
DG5020_D1_027	naIs37	bcIs39	wt	52.758	18	23.641	71.608	DG5020	1	18.85	47.967	F
DG5020_D1_029	naIs37	bcIs39	wt	49.725	15	34.529	86.558	DG5020	1	36.833	52.029	F
DG5020_D1_030	naIs37	bcIs39	wt	33.258	9	20.331	68.792	DG5020	1	35.534	48.461	F
DG5020_D1_001	naIs37	bcIs39	wt	37.592	13	18.575	35.642	DG5020	2	-1.95	17.067	T
DG5020_D1_005_str	naIs37	bcIs39	wt	48.642	16	27.097	37.592	DG5020	2	-11.05	10.495	F
DG5020_D1_013f	naIs37	bcIs39	wt	49.292	12	31.417	35.425	DG5020	2	-13.867	4.008	F
DG5020_D1_015	naIs37	bcIs39	wt	51.892	17	27.854	46.042	DG5020	2	-5.85	18.188	T
DG5020_D1_023	naIs37	bcIs39	wt	55.358	9	37.134	33.475	DG5020	2	-21.883	-3.659	F
DG5020_D1_024	naIs37	bcIs39	wt	59.908	17	38.56	43.225	DG5020	2	-16.683	4.665	F
DG5020_D1_026	naIs37	bcIs39	wt	54.275	27	26.429	37.375	DG5020	2	-16.9	10.946	F
DG5131_007	naIs37	bcIs39	inx8qy78	43.481	8	30.875	28.097	DG5131(bcIs39)	2	-15.384	-2.778	F	TRUE
DG5131_025f	naIs37	bcIs39	inx8qy78	42.792	8	25.648	78.758	DG5131(bcIs39)	1	35.966	53.11		FALSE
DG5131_001	naIs37	bcIs39	inx8qy78	35.362	19	19.922	40.49	DG5131(bcIs39)	2	5.128	20.568	F	TRUE
DG5131_008	naIs37	bcIs39	inx8qy78	32.584	6	20.69	25.106	DG5131(bcIs39)	2	-7.478	4.416	F	TRUE
DG5131_019.f	naIs37	bcIs39	inx8qy78	45.608	12	23.472	31.092	DG5131(bcIs39)	2	-14.516	7.62		FALSE
DG5131_021f	naIs37	bcIs39	inx8qy78	46.258	13	25.258	42.142	DG5131(bcIs39)	2	-4.116	16.884		TRUE
DG5131_022f	naIs37	bcIs39	inx8qy78	56.658	14	34.342	52.975	DG5131(bcIs39)	2	-3.683	18.633		TRUE
DG5131_026f	naIs37	bcIs39	inx8qy78	42.792	5	33.345	33.475	DG5131(bcIs39)	2	-9.317	0.13		FALSE
DG5131_031f	naIs37	bcIs39	inx8qy78	55.358	13	31.175	37.808	DG5131(bcIs39)	2	-17.55	6.633		TRUE
DG5131_003	naIs37	bcIs39	inx8qy78	17.628	6	14.921	14.209	DG5131(bcIs39)	3	-3.419	-0.712	F	TRUE
DG5131_004	naIs37	bcIs39	inx8qy78	38.994	6	27.385	7.158	DG5131(bcIs39)	3	-31.836	-20.227	F	TRUE
DG5131_005	naIs37	bcIs39	inx8qy78	31.516	4	23.717	17.628	DG5131(bcIs39)	3	-13.888	-6.089	F	TRUE
DG5131_011f	naIs37	bcIs39	inx8qy78	27.029	9	16.963	15.064	DG5131(bcIs39)	3	-11.965	-1.899	F	TRUE
DG5131_012f_str	naIs37	bcIs39	inx8qy78	25.533	2	19.551	8.226	DG5131(bcIs39)	3	-17.307	-11.325	F	TRUE
DG5131_013f	naIs37	bcIs39	inx8qy78	27.029	5	20.234	17.841	DG5131(bcIs39)	3	-9.188	-2.393	F	TRUE
DG5131_015f	naIs37	bcIs39	inx8qy78	22.115	1	22.115	9.081	DG5131(bcIs39)	3	-13.034	-13.034	F	TRUE
DG5131_016f	naIs37	bcIs39	inx8qy78	15.918	2	14.636	13.354	DG5131(bcIs39)	3	-2.564	-1.282	F	TRUE
DG5131_017f	naIs37	bcIs39	inx8qy78	36.942	7	21.063	9.208	DG5131(bcIs39)	3	-27.734	-11.855		TRUE
DG5131_018f	naIs37	bcIs39	inx8qy78	20.042	2	17.117	5.308	DG5131(bcIs39)	3	-14.734	-11.809		TRUE
DG5131_020f	naIs37	bcIs39	inx8qy78	40.192	8	25.946	24.592	DG5131(bcIs39)	3	-15.6	-1.354		TRUE
DG5131_023f	naIs37	bcIs39	inx8qy78	33.042	10	16.207	10.075	DG5131(bcIs39)	3	-22.967	-6.132		TRUE
DG5131_024f	naIs37	bcIs39	inx8qy78	34.125	7	17.411	12.025	DG5131(bcIs39)	3	-22.1	-5.386		FALSE
DG5131_027f	naIs37	bcIs39	inx8qy78	35.858	8	17.469	14.842	DG5131(bcIs39)	3	-21.016	-2.627		TRUE
DG5131_028f	naIs37	bcIs39	inx8qy78	38.242	8	26.975	11.808	DG5131(bcIs39)	3	-26.434	-15.167		TRUE
DG5131_029f	naIs37	bcIs39	inx8qy78	26.758	3	17.586	0.975	DG5131(bcIs39)	3	-25.783	-16.611		TRUE
DG5131_030f	naIs37	bcIs39	inx8qy78	31.308	8	20.692	17.008	DG5131(bcIs39)	3	-14.3	-3.684		TRUE
DG5131_001	naIs37	inx8qy78	inx8qy78	35.362	19	19.922	40.49	DG5131(qy78)	2	5.128	20.568	F	TRUE
DG5131_008	naIs37	inx8qy78	inx8qy78	32.584	6	20.69	25.106	DG5131(qy78)	2	-7.478	4.416	F	TRUE
DG5131_021f	naIs37	inx8qy78	inx8qy78	46.258	13	25.258	42.142	DG5131(qy78)	2	-4.116	16.884		TRUE
DG5131_022f	naIs37	inx8qy78	inx8qy78	56.658	14	34.342	52.975	DG5131(qy78)	2	-3.683	18.633		TRUE
DG5131_031f	naIs37	inx8qy78	inx8qy78	55.358	13	31.175	37.808	DG5131(qy78)	2	-17.55	6.633		TRUE
DG5131_003	naIs37	inx8qy78	inx8qy78	17.628	6	14.921	14.209	DG5131(qy78)	3	-3.419	-0.712	F	TRUE
DG5131_004	naIs37	inx8qy78	inx8qy78	38.994	6	27.385	7.158	DG5131(qy78)	3	-31.836	-20.227	F	TRUE
DG5131_005	naIs37	inx8qy78	inx8qy78	31.516	4	23.717	17.628	DG5131(qy78)	3	-13.888	-6.089	F	TRUE
DG5131_007	naIs37	inx8qy78	inx8qy78	43.481	8	30.875	28.097	DG5131(qy78)	3	-15.384	-2.778	F	TRUE
DG5131_011f	naIs37	inx8qy78	inx8qy78	27.029	9	16.963	15.064	DG5131(qy78)	3	-11.965	-1.899	F	TRUE
DG5131_012f_str	naIs37	inx8qy78	inx8qy78	25.533	2	19.551	8.226	DG5131(qy78)	3	-17.307	-11.325	F	TRUE
DG5131_013f	naIs37	inx8qy78	inx8qy78	27.029	5	20.234	17.841	DG5131(qy78)	3	-9.188	-2.393	F	TRUE
DG5131_015f	naIs37	inx8qy78	inx8qy78	22.115	1	22.115	9.081	DG5131(qy78)	3	-13.034	-13.034	F	TRUE
DG5131_016f	naIs37	inx8qy78	inx8qy78	15.918	2	14.636	13.354	DG5131(qy78)	3	-2.564	-1.282	F	TRUE
DG5131_017f	naIs37	inx8qy78	inx8qy78	36.942	7	21.063	9.208	DG5131(qy78)	3	-27.734	-11.855		TRUE
DG5131_018f	naIs37	inx8qy78	inx8qy78	20.042	2	17.117	5.308	DG5131(qy78)	3	-14.734	-11.809		TRUE
DG5131_019.f	naIs37	inx8qy78	inx8qy78	45.608	12	23.472	22.208	DG5131(qy78)	3	-23.4	-1.264		FALSE
DG5131_020f	naIs37	inx8qy78	inx8qy78	40.192	8	25.946	24.592	DG5131(qy78)	3	-15.6	-1.354		TRUE
DG5131_023f	naIs37	inx8qy78	inx8qy78	33.042	10	16.207	10.075	DG5131(qy78)	3	-22.967	-6.132		TRUE
DG5131_024f	naIs37	inx8qy78	inx8qy78	34.125	7	17.411	8.342	DG5131(qy78)	3	-25.783	-9.069		FALSE
DG5131_025f	naIs37	inx8qy78	inx8qy78	42.792	8	25.648	19.825	DG5131(qy78)	3	-22.967	-5.823		FALSE
DG5131_026f	naIs37	inx8qy78	inx8qy78	42.792	5	33.345	19.608	DG5131(qy78)	3	-23.184	-13.737		FALSE
DG5131_027f	naIs37	inx8qy78	inx8qy78	35.858	8	17.469	14.842	DG5131(qy78)	3	-21.016	-2.627		TRUE
DG5131_028f	naIs37	inx8qy78	inx8qy78	38.242	8	26.975	11.808	DG5131(qy78)	3	-26.434	-15.167		TRUE
DG5131_029f	naIs37	inx8qy78	inx8qy78	26.758	3	17.586	0.975	DG5131(qy78)	3	-25.783	-16.611		TRUE
DG5131_030f	naIs37	inx8qy78	inx8qy78	31.308	8	20.692	17.008	DG5131(qy78)	3	-14.3	-3.684		TRUE
KLG006_L4p24_015	cpIs122	inx8qy78	inx8qy78	36.725	7	26.727	34.342	KLG006(qy78)	2	-2.383	7.615	F	TRUE
KLG006_L4p24_017	cpIs122	inx8qy78	inx8qy78	39.108	7	23.508	23.508	KLG006(qy78)	2	-15.6	0	F	TRUE
KLG006_L4p24_002	cpIs122	inx8qy78	inx8qy78	77.892	25	33.804	41.925	KLG006(qy78)	2	-35.967	8.121	T	FALSE
KLG006_L4p24_007	cpIs122	inx8qy78	inx8qy78	43.875	15	24.072	28.708	KLG006(qy78)	2	-15.167	4.636	F	TRUE
KLG006_L4p24_010	cpIs122	inx8qy78	inx8qy78	73.558	12	33.8	46.475	KLG006(qy78)	2	-27.083	12.675	F	FALSE
KLG006_L4p24_012	cpIs122	inx8qy78	inx8qy78	54.275	23	28.699	40.625	KLG006(qy78)	2	-13.65	11.926	F	TRUE
KLG006_L4p24_022	cpIs122	inx8qy78	inx8qy78	32.392	11	20.219	34.558	KLG006(qy78)	2	2.166	14.339	F	TRUE
KLG006_L4p24_023	cpIs122	inx8qy78	inx8qy78	33.258	7	20.475	24.592	KLG006(qy78)	2	-8.666	4.117	F	TRUE
KLG006_L4p24_024	cpIs122	inx8qy78	inx8qy78	47.775	9	23.918	32.608	KLG006(qy78)	2	-15.167	8.69	F	TRUE
KLG006_L4p24_025f	cpIs122	inx8qy78	inx8qy78	43.442	13	27.275	30.658	KLG006(qy78)	2	-12.784	3.383	F	TRUE
KLG006_L4p24_003	cpIs122	inx8qy78	inx8qy78	49.292	8	25.079	3.575	KLG006(qy78)	3	-45.717	-21.504	F	TRUE
KLG006_L4p24_004	cpIs122	inx8qy78	inx8qy78	55.358	7	35.27	8.125	KLG006(qy78)	3	-47.233	-27.145	F	FALSE
KLG006_L4p24_005	cpIs122	inx8qy78	inx8qy78	34.342	8	25.648	23.508	KLG006(qy78)	3	-10.834	-2.14	T	TRUE
KLG006_L4p24_006	cpIs122	inx8qy78	inx8qy78	34.775	7	17.442	16.142	KLG006(qy78)	3	-18.633	-1.3	F	TRUE
KLG006_L4p24_008	cpIs122	inx8qy78	inx8qy78	41.275	15	25.603	22.208	KLG006(qy78)	3	-19.067	-3.395	T	FALSE
KLG006_L4p24_009	cpIs122	inx8qy78	inx8qy78	31.525	12	20.439	15.058	KLG006(qy78)	3	-16.467	-5.381	F	TRUE
KLG006_L4p24_019	cpIs122	inx8qy78	inx8qy78	27.192	8	16.142	15.058	KLG006(qy78)	3	-12.134	-1.084	F	TRUE
KLG006_L4p24_020	cpIs122	inx8qy78	inx8qy78	37.158	8	25.892	22.425	KLG006(qy78)	3	-14.733	-3.467	F	TRUE
KLG006_L4p24_021	cpIs122	inx8qy78	inx8qy78	32.392	11	20.79	15.492	KLG006(qy78)	3	-16.9	-5.298	F	TRUE
KLG006_L4p24_026f	cpIs122	inx8qy78	inx8qy78	46.042	6	30.911	26.542	KLG006(qy78)	3	-19.5	-4.369	F	TRUE
KLG006_L4p24_015	cpIs122	tnIs6	inx8qy78	36.725	7	26.727	34.342	KLG006(tnIs6)	2	-2.383	7.615	F	TRUE
KLG006_L4p24_017	cpIs122	tnIs6	inx8qy78	39.108	7	23.508	23.508	KLG006(tnIs6)	2	-15.6	0	F	TRUE
KLG006_L4p24_002	cpIs122	tnIs6	inx8qy78	77.892	25	33.804	41.925	KLG006(tnIs6)	2	-35.967	8.121	T	FALSE
KLG006_L4p24_007	cpIs122	tnIs6	inx8qy78	43.875	15	24.072	28.708	KLG006(tnIs6)	2	-15.167	4.636	F	TRUE
KLG006_L4p24_008	cpIs122	tnIs6	inx8qy78	41.275	15	25.603	34.992	KLG006(tnIs6)	2	-6.283	9.389	F	FALSE
KLG006_L4p24_010	cpIs122	tnIs6	inx8qy78	73.558	12	33.8	46.475	KLG006(tnIs6)	2	-27.083	12.675	F	FALSE
KLG006_L4p24_012	cpIs122	tnIs6	inx8qy78	54.275	23	28.699	40.625	KLG006(tnIs6)	2	-13.65	11.926	F	TRUE
KLG006_L4p24_022	cpIs122	tnIs6	inx8qy78	32.392	11	20.219	34.558	KLG006(tnIs6)	2	2.166	14.339	F	TRUE
KLG006_L4p24_023	cpIs122	tnIs6	inx8qy78	33.258	7	20.475	24.592	KLG006(tnIs6)	2	-8.666	4.117	F	TRUE
KLG006_L4p24_024	cpIs122	tnIs6	inx8qy78	47.775	9	23.918	32.608	KLG006(tnIs6)	2	-15.167	8.69	F	TRUE
KLG006_L4p24_025f	cpIs122	tnIs6	inx8qy78	43.442	13	27.275	30.658	KLG006(tnIs6)	2	-12.784	3.383	F	TRUE
KLG006_L4p24_003	cpIs122	tnIs6	inx8qy78	49.292	8	25.079	3.575	KLG006(tnIs6)	3	-45.717	-21.504	F	TRUE
KLG006_L4p24_004	cpIs122	tnIs6	inx8qy78	55.358	7	35.27	8.125	KLG006(tnIs6)	3	-47.233	-27.145	T	FALSE
KLG006_L4p24_005	cpIs122	tnIs6	inx8qy78	34.342	8	25.648	23.508	KLG006(tnIs6)	3	-10.834	-2.14	T	TRUE
KLG006_L4p24_006	cpIs122	tnIs6	inx8qy78	34.775	7	17.442	16.142	KLG006(tnIs6)	3	-18.633	-1.3	F	TRUE
KLG006_L4p24_009	cpIs122	tnIs6	inx8qy78	31.525	12	20.439	15.058	KLG006(tnIs6)	3	-16.467	-5.381	F	TRUE
KLG006_L4p24_019	cpIs122	tnIs6	inx8qy78	27.192	8	16.142	15.058	KLG006(tnIs6)	3	-12.134	-1.084	F	TRUE
KLG006_L4p24_020	cpIs122	tnIs6	inx8qy78	37.158	8	25.892	22.425	KLG006(tnIs6)	3	-14.733	-3.467	F	TRUE
KLG006_L4p24_021	cpIs122	tnIs6	inx8qy78	32.392	11	20.79	15.492	KLG006(tnIs6)	3	-16.9	-5.298	F	TRUE
KLG006_L4p24_026f	cpIs122	tnIs6	inx8qy78	46.042	6	30.911	26.542	KLG006(tnIs6)	3	-19.5	-4.369	F	TRUE
