# Supplementary material for: Innexin function dictates the spatial relationship between distal somatic cells in the Caenorhabditis elegans gonad without impacting the germline stem cell pool
Source: eLife. 2022 Sep 13;11:e74955. doi: 10.7554/eLife.74955 (PMC9473689; doi:10.7554/eLife.74955)
Supplement: Figure 2—source data 1. [file elife-74955-fig2-data1.xlsx]

## Sheet: Sheet1
genotype	gonad	overlap	INX-8_start	PZ	PZ_micron	INX8_start_micron	overlap_micron
DG5063	001-002.tiff	12	8	19	70.3374	28.5037	44.7768
DG5063	003-004.tiff	7	10	16	77.8211	49.7122	34.8912
DG5063	005-006.tiff	4	9	12	50.4208	36.2364	17.8028
DG5063	007-008.tiff	4	12	15	61.7347	50.1047	15.244
DG5063	009-010.tiff	3	17	19	69.8782	61.584	12.5513
DG5063	011-012.tiff	9	10	18	62.9837	32.8414	33.6521
DG5063	013-014.tiff	3	15	17	67.5106	58.6595	13.4893
DG5063	015-016.tiff	7	11	17	74.1182	48.6724	29.5538
DG5063	017-018.tiff	1	15	15	58.2567	58.2567	3.66509
DG5063	019-020.tiff	15	3	17	66.4329	12.2894	59.1097
DG5063	021-022.tiff	5	15	19	78.0858	60.9139	21.0203
DG5063	023-024.tiff	9	11	19	75.9597	41.3695	37.9058
DG5063	025-026.tiff	3	16	18	74.1565	66.4286	11.9022
DG5063	027-028.tiff	3	16	18	72.2414	62.3558	14.1087
DG5063	029-030.tiff	11	8	18	64.4143	30.1371	37.6492
DG5063	031-032.tiff	1	19	19	79.4149	79.4149	4.78153
DG5063	033-034.tiff	7	13	19	75.9105	52.7526	27.503
DG5063	035-036.tiff	4	8	11	50.0995	38.5298	16.0177
DG5063	037-038.tiff	4	13	16	62.158	47.055	19.283
DG5063	039-040.tiff	6	11	16	66.7864	43.1149	28.3754
DG5063	041-042.tiff	3	15	17	61.2397	54.5544	10.2075
DG5063	043-044.tiff	6	9	14	46.1003	28.2279	20.6732
DG5063	045-046.tiff	4	15	18	67.055	57.4538	12.7689
DG5063	047-048.tiff	6	7	12	49.8972	25.6718	28.1486
DG5063	049-050.tiff	8	8	15	58.0416	32.5997	29.4672
DG5063	051-052.tiff	6	10	15	56.3027	35.0373	24.513
DG5063	053-054.tiff	0	18	17	66.291	71.407	0
DG5063	055-056.tiff	8	11	18	67.1357	43.4423	27.6809
DG5063	057-058.tiff	3	16	18	69.415	60.9849	13.1818
DG5063	059-060.tiff	5	11	15	62.5468	47.5472	18.8926
DG5063	061-062.tiff	12	11	22	75.376	36.755	42.6991
DG5063	063-064.tiff	10	8	17	62.5529	28.3565	37.229
N2	001-002.tiff	0	29	19	69.8034	106.077	0
N2	003-004.tiff	3	17	19	80.5212	71.4729	13.9707
N2	005-006.tiff	0	27	23	83.3617	99.185	0
N2	007-008.tiff	0	27	22	82.2177	101.826	0
N2	009-010.tiff	0	24	21	74.9867	86.5698	0
N2	011-012.tiff	1	20	20	70.7799	70.7799	2.90476
N2	013-014.tiff	0	26	22	105.872	110.962	0
N2	015-016.tiff	0	27	21	77.8316	101.768	0
N2	017-018.tiff	0	26	23	84.1763	97.4869	0
N2	019-020.tiff	0	22	21	82.7183	86.1131	0
N2	021-022.tiff	0	20	18	66.2101	75.15	0
N2	023-024.tiff	10	10	19	69.3333	37.3594	36.0542
N2	025-026.tiff	0	21	16	60.359	81.4258	0
N2	027-028.tiff	0	23	20	77.0136	88.764	0
N2	029-030.tiff	5	16	20	70.6305	56.9224	18.5658
N2	031-032.tiff	0	21	17	69.6284	87.0392	0
N2	033-034.tiff	5	13	17	68.4509	51.4029	21.0198
N2	035-036.tiff	0	22	19	74.0324	86.0711	0
N2	037-038.tiff	0	19	18	68.2151	72.1968	0
N2	039-040.tiff	0	30	22	79.0656	107.774	0
N2	041-042.tiff	0	27	22	78.9333	98.1833	0
N2	043-044.tiff	0	24	23	82.0408	85.8507	0
N2	045-046.tiff	0	31	22	80.3475	118.87	0
N2	047-048.tiff	3	20	22	68.1828	62.4996	8.47411
N2	049-050.tiff	0	25	22	83.3113	99.1338	0
N2	051-052.tiff	0	28	22	85.034	107.928	0
N2	053-054.tiff	3	17	19	67.5013	60.0725	11.6335
N2	055-056.tiff	0	28	20	69.5199	103.002	0
