# Supplementary material for: Innexin function dictates the spatial relationship between distal somatic cells in the Caenorhabditis elegans gonad without impacting the germline stem cell pool
Source: eLife. 2022 Sep 13;11:e74955. doi: 10.7554/eLife.74955 (PMC9473689; doi:10.7554/eLife.74955)
Supplement: Figure 3—source data 1. [file elife-74955-fig3-data1.xlsx]

## Sheet: Sheet1
genotype	gonad	overlap	sheath	SYGL	SYGL_micron	sheath_micron	overlap_micron
markersOnly	005-006.tiff	0	12	10	43.2606	54.0064	0
markersOnly	027-028.tiff	0	16	15	62.5167	67.9159	0
markersOnly	029-030.tiff	0	35	12	53.6945	172.825	0
markersOnly	045-046.tiff	0	18	12	52.1943	77.8072	0
markersOnly	047-048.tiff	0	19	10	43.203	89.6355	0
markersOnly	053-054.tiff	6	8	13	55.8462	36.2896	23.4939
markersOnly	059-060.tiff	0	11	10	44.9015	49.7188	0
markersOnly	061-062.tiff	1	12	12	50.6315	50.6315	5.32997
markersOnly	063-064.tiff	1	12	12	56.3895	56.3895	3.52224
markersOnly	071-072.tiff	0	19	13	54.6757	76.3394	0
markersOnly	075-076.tiff	0	15	13	54.5083	63.6442	0
markersOnly	077-078.tiff	1	11	11	44.3019	44.3019	3.60067
markersOnly	079-080.tiff	0	19	13	58.1163	80.9936	0
markersOnly	085-086.tiff	3	9	11	47.7302	38.3423	14.4588
markersOnly	095-096.tiff	5	8	12	46.138	30.463	19.2351
markersOnly	101-102.tiff	0	19	12	48.9054	78.2871	0
markersOnly	103-104.tiff	0	17	15	66.9331	76.8485	0
markersOnly	109-110.tiff	7	7	13	56.8808	34.5844	28.4037
ag17	001-002.tiff	6	5	10	46.04	21.5836	28.7891
ag17	003-004.tiff	10	3	12	46.9953	13.0886	38.4383
ag17	007-008.tiff	9	5	13	54.6448	19.8182	39.5552
ag17	009-010.tiff	9	5	13	63.8697	23.9578	45.0471
ag17	011-012.tiff	12	3	14	61.3373	13.8996	53.3408
ag17	013-014.tiff	6	8	13	51.2214	29.5977	26.0773
ag17	015-016.tiff	6	6	11	50.4179	25.8232	29.2263
ag17	021-022.tiff	9	5	13	61.7786	21.7824	45.2469
ag17	031-032.tiff	11	2	12	50.32	8.84696	46.9992
ag17	035-036.tiff	6	4	9	43.2538	18.6275	30.8851
ag17	037-038.tiff	11	2	12	54.6211	8.372	51.6435
ag17	057-058.tiff	10	4	13	54.1472	17.6045	41.1828
ag17	067-068.tiff	11	5	15	59.263	23.7891	40.3399
ag17	089-090.tiff	8	3	10	41.3172	13.2986	32.1124
ag17	091-092.tiff	6	4	9	40.6368	20.4626	26.278
ag17	093-094.tiff	10	4	13	56.1613	15.7067	44.1356
ag17	097-098.tiff	7	4	10	43.1943	15.056	32.4817
ag17	099-100.tiff	10	4	13	51.6251	15.5414	39.3842
ag17	105-106.tiff	9	3	11	53.914	16.0089	43.7396
ag17	107-108.tiff	12	3	14	55.4809	12.2471	48.4637
markersOnly	001-002.tiff	0	28	13	48.151	111.026	0
markersOnly	003-004.tiff	0	18	13	52.882	69.2649	0
markersOnly	005-006.tiff	0	20	13	56.0246	83.2413	0
markersOnly	013-014.tiff	0	27	12	52.1285	129.088	0
markersOnly	015-016.tiff	0	22	18	59.4014	75.4396	0
markersOnly	017-018.tiff	0	44	12	49.1333	188.942	0
markersOnly	027-028.tiff	1	13	13	53.935	53.935	3.35514
markersOnly	033-034.tiff	0	17	14	62.7814	74.7819	0
markersOnly	039-040.tiff	0	14	8	34.9165	59.2146	0
markersOnly	041-042.tiff	0	15	13	57.9316	66.534	0
markersOnly	049-050.tiff	3	14	16	69.9542	60.2663	13.7829
markersOnly	065-066.tiff	0	21	11	50.6776	92.9718	0
markersOnly	069-070.tiff	0	27	13	64.1372	122.414	0
markersOnly	071-072.tiff	0	15	11	47.8222	65.1962	0
markersOnly	087-088.tiff	0	20	12	46.7095	79.4536	0
markersOnly	089-090.tiff	0	21	13	50.1689	76.3857	0
markersOnly	095-096.tiff	0	11	10	45.7338	50.2299	0
markersOnly	097-098.tiff	0	15	9	35.7708	62.0879	0
markersOnly	099-100.tiff	0	15	13	51.9836	60.6282	0
markersOnly	103-104.tiff	0	16	12	53.1034	69.8584	0
markersOnly	105-106.tiff	0	17	9	43.0336	73.88	0
ag17	011-012.tiff	12	4	15	65.0154	15.3262	54.038
ag17	023-024.tiff	14	3	16	68.8047	12.2267	60.7743
ag17	025-026.tiff	9	3	11	45.7311	11.4223	37.8705
ag17	035-036.tiff	9	3	11	50.1013	12.7269	42.4217
ag17	047-048.tiff	5	3	7	29.1569	13.3826	22.0518
ag17	057-058.tiff	10	3	12	56.7935	16.1935	47.6958
ag17	059-060.tiff	10	5	14	63.3114	23.2867	44.8456
ag17	073-074.tiff	9	4	12	52.024	16.3113	40.7323
ag17	075-076.tiff	5	5	9	40.1494	23.7557	20.721
ag17	077-078.tiff	10	3	12	53.6387	14.3907	44.2675
ag17	081-082.tiff	9	3	11	45.411	12.7343	36.6583
ag17	085-086.tiff	10	4	13	64.5089	16.8271	52.2633
ag17	091-092.tiff	9	4	12	53.4905	18.4984	40.0071
ag17	093-094.tiff	9	5	13	58.3457	24.5789	38.2834
ag17	101-102.tiff	4	7	10	44.8685	31.1641	18.2331
ag17	107-108.tiff	4	5	8	37.1304	21.8324	20.9078
ag17	109-110.tiff	11	3	13	62.4146	13.9827	52.7098
ag17	111-112.tiff	4	7	10	47.3425	31.6301	22.6166
ag17	113-114.tiff	9	1	9	41.7393	4.29899	41.7393
ag17	115-116.tiff	10	4	13	61.1731	20.0997	46.0371
markersOnly	001-002.tiff	0	24	14	52.2125	94.445	0
markersOnly	003-004.tiff	0	20	11	40.6711	75.9255	0
markersOnly	009-010.tiff	0	30	15	67.3913	127.623	0
markersOnly	011-012.tiff	0	26	13	54.001	110.389	0
markersOnly	019-020.tiff	0	16	13	55.0547	68.0831	0
markersOnly	037-038.tiff	0	23	12	47.2842	85.488	0
markersOnly	043-044.tiff	0	26	14	52.0101	100.402	0
markersOnly	045-046.tiff	0	17	12	47.6273	70.7833	0
markersOnly	053-054.tiff	0	22	10	41.8018	95.0988	0
markersOnly	087-088.tiff	0	22	12	52.2606	94.939	0
markersOnly	089-090.tiff	0	13	9	35.9057	52.3709	0
markersOnly	091-092.tiff	0	26	11	43.4108	108.576	0
markersOnly	095-096.tiff	0	11	10	44.6443	49.864	0
markersOnly	099-100.tiff	0	17	10	47.4758	88.7334	0
markersOnly	105-106.tiff	0	19	13	52.9543	79.2628	0
markersOnly	111-112.tiff	0	28	10	48.3745	122.272	0
markersOnly	113-114.tiff	0	27	10	47.3373	119.193	0
markersOnly	115-116.tiff	0	35	12	53.0301	156.82	0
markersOnly	117-118.tiff	0	27	13	55.4242	113.277	0
markersOnly	119-120.tiff	0	24	11	47.9291	100.757	0
ag17	015-016.tiff	5	7	11	53.5053	31.2881	26.7699
ag17	017-018.tiff	10	3	12	39.7865	11.979	31.7151
ag17	021-022.tiff	11	4	14	61.1673	15.4746	50.7769
ag17	023-024.tiff	0	14	11	49.0415	60.1783	0
ag17	025-026.tiff	10	3	12	46.4848	11.3538	39.5555
ag17	027-028.tiff	0	21	11	45.8951	85.9493	0
ag17	033-034.tiff	8	4	11	48.0211	17.6932	35.753
ag17	035-036.tiff	10	3	12	44.488	9.19071	38.9255
ag17	039-040.tiff	11	2	12	47.7757	8.74977	44.4319
ag17	041-042.tiff	9	3	11	47.7782	12.7179	40.8948
ag17	047-048.tiff	7	2	8	38.3976	10.3681	33.5101
ag17	059-060.tiff	9	5	13	53.6637	19.8735	38.2637
ag17	061-062.tiff	9	3	11	43.6767	13.3597	33.8242
ag17	067-068.tiff	6	6	11	43.8162	22.9626	26.0419
ag17	069-070.tiff	5	6	10	47.6154	28.5409	24.5211
ag17	071-072.tiff	9	4	12	51.4709	17.6592	38.8313
ag17	081-082.tiff	11	3	13	49.5598	11.6302	43.1937
ag17	093-094.tiff	7	6	12	47.2248	23.0009	27.276
ag17	097-098.tiff	9	4	12	45.3253	16.3058	32.5318
ag17	101-102.tiff	10	1	10	40.0131	4.79928	40.0131
ag17	103-104.tiff	9	3	11	44.0676	12.6634	35.4034
ag17	107-108.tiff	8	3	10	35.0378	11.6913	28.0166
ag17	109-110.tiff	8	4	11	40.967	16.0649	29.1521
markersOnly	001-002.tiff	0	22	14	55.6352	89.0482	0
markersOnly	003-004.tiff	0	24	13	56.6543	101.597	0
markersOnly	005-006.tiff	0	22	12	45.7007	88.5697	0
markersOnly	023-024.tiff	0	23	14	58.7125	100.29	0
markersOnly	025-026.tiff	0	15	12	40.3238	51.8688	0
markersOnly	035-036.tiff	0	18	10	44.2239	79.5495	0
markersOnly	037-038.tiff	0	17	14	51.7199	65.5164	0
markersOnly	039-040.tiff	3	12	14	44.6996	37.8729	9.32335
markersOnly	041-042.tiff	0	19	11	42.8176	74.0442	0
markersOnly	043-044.tiff	0	17	12	50.2618	71.3966	0
markersOnly	047-048.tiff	0	15	10	39.9117	65.4554	0
markersOnly	049-050.tiff	0	23	13	52.5095	96.1155	0
markersOnly	055-056.tiff	0	14	11	43.4057	54.4594	0
markersOnly	057-058.tiff	0	15	11	43.4546	60.8549	0
markersOnly	061-062.tiff	0	17	11	47.9041	73.4592	0
markersOnly	063-064.tiff	0	22	13	56.175	98.2325	0
markersOnly	065-066.tiff	1	9	9	40.4234	40.4234	5.44554
markersOnly	067-068.tiff	0	16	14	55.6043	62.6888	0
markersOnly	069-070.tiff	0	18	14	58.0451	72.6975	0
markersOnly	073-074.tiff	0	16	12	42.1125	58.0413	0
markersOnly	075-076.tiff	0	16	11	43.0472	60.4849	0
ag17	007-008.tiff	7	4	10	40.8689	15.5158	30.5415
ag17	009-010.tiff	6	4	9	39.3667	16.0035	28.219
ag17	011-012.tiff	7	4	10	50.478	18.7872	36.4424
ag17	013-014.tiff	3	10	12	53.1886	44.4838	15.1956
ag17	015-016.tiff	12	1	12	57.1601	4.6757	57.1601
ag17	017-018.tiff	4	7	10	45.4392	32.0057	20.42
ag17	029-030.tiff	6	4	9	37.8601	17.7943	24.4476
ag17	031-032.tiff	8	5	12	46.3031	16.0704	33.0375
ag17	051-052.tiff	10	3	12	54.8695	15.6518	45.5395
ag17	079-080.tiff	3	6	8	36.8157	27.1722	14.4098
ag17	085-086.tiff	12	4	15	62.1451	16.1605	51.017
ag17	095-096.tiff	11	4	14	59.7325	15.0334	48.626
ag17	097-098.tiff	10	2	11	44.5259	8.94399	39.5324
ag17	099-100.tiff	8	5	12	49.3984	17.6867	35.9795
ag17	101-102.tiff	9	3	11	44.2264	13.1408	36.0773
ag17	105-106.tiff	8	4	11	44.4533	16.1067	32.325
ag17	107-108.tiff	8	3	10	39.4828	12.2443	31.8383
ag17	109-110.tiff	4	6	9	38.7339	24.0723	18.4143
ag17	111-112.tiff	4	4	7	39.3582	23.8325	22.2143
ag17	113-114.tiff	5	6	10	47.4151	28.707	23.4401
markersOnly	005-006.tiff	0	23	12	47.4834	93.124	0
markersOnly	009-010.tiff	0	22	11	40.7349	91.0134	0
markersOnly	011-012.tiff	0	27	15	61.7209	113.428	0
markersOnly	017-018.tiff	2	9	10	42.4529	38.3449	8.53629
markersOnly	021-022.tiff	0	41	11	43.1644	163.809	0
markersOnly	029-030.tiff	0	25	13	52.1955	104.241	0
markersOnly	049-050.tiff	0	27	11	41.367	110.288	0
markersOnly	051-052.tiff	0	24	12	51.7808	104.927	0
markersOnly	053-054.tiff	0	24	14	57.982	105.689	0
markersOnly	063-064.tiff	0	27	14	54.4277	109.459	0
markersOnly	075-076.tiff	0	15	10	42.4581	63.4677	0
markersOnly	079-080.tiff	0	22	13	50.4139	85.0894	0
markersOnly	083-084.tiff	0	21	11	38.6587	81.4712	0
markersOnly	089-090.tiff	0	12	10	41.9531	49.0662	0
markersOnly	091-092.tiff	0	15	11	41.0531	56.1356	0
markersOnly	099-100.tiff	0	36	13	48.8771	152.732	0
markersOnly	109-110.tiff	0	12	10	36.7311	44.1029	0
markersOnly	111-112.tiff	0	20	11	42.3515	76.149	0
markersOnly	113-114.tiff	0	21	11	39.0072	76.6678	0
markersOnly	115-116.tiff	0	20	11	42.0102	82.1428	0
qy78	007-008.tiff	1	11	11	42.2915	42.2915	3.99156
qy78	019-020.tiff	0	15	10	42.1641	61.4035	0
qy78	023-024.tiff	7	5	11	44.1981	18.2476	29.7386
qy78	027-028.tiff	5	7	11	43.7945	29.1114	19.0465
qy78	035-036.tiff	0	14	8	35.9954	62.6212	0
qy78	037-038.tiff	5	7	11	43.6228	27.9057	19.4852
qy78	041-042.tiff	0	15	12	48.853	61.8324	0
qy78	043-044.tiff	2	9	10	41.7224	38.3521	7.17864
qy78	045-046.tiff	7	5	11	43.7399	18.8401	28.8495
qy78	047-048.tiff	8	6	13	49.0575	22.3481	29.8943
qy78	055-056.tiff	6	6	11	43.6168	23.7343	23.3682
qy78	057-058.tiff	9	3	11	43.713	11.2009	36.54
qy78	065-066.tiff	5	7	11	42.7424	27.9068	19.3871
qy78	067-068.tiff	0	11	10	41.034	44.2887	0
qy78	073-074.tiff	0	26	15	57.8357	99.5734	0
qy78	077-078.tiff	9	5	13	48.8858	18.2784	34.4383
qy78	081-082.tiff	0	21	13	48.7164	86.5267	0
qy78	095-096.tiff	6	2	7	26.7272	6.94509	23.754
qy78	097-098.tiff	0	10	9	39.9187	44.0535	0
qy78	101-102.tiff	6	5	10	37.6065	19.0536	22.7546
qy78	105-106.tiff	8	3	10	40.1713	12.9043	31.4482
qy78	107-108.tiff	5	6	10	38.4504	23.0482	20.2015
markersOnly	007-008.tiff	0	23	12	51.1537	98.7541	0
markersOnly	009-010.tiff	0	31	12	52.9603	126.719	0
markersOnly	029-030.tiff	0	35	15	57.1978	139.892	0
markersOnly	031-032.tiff	0	36	10	43.3665	154.101	0
markersOnly	033-034.tiff	0	23	12	41.8014	84.7232	0
markersOnly	035-036.tiff	0	17	12	41.7595	61.5895	0
markersOnly	041-042.tiff	0	32	11	42.8603	125.008	0
markersOnly	047-048.tiff	0	19	10	42.9532	76.5659	0
markersOnly	053-054.tiff	0	27	12	50.194	112.734	0
markersOnly	055-056.tiff	0	23	12	42.506	86.9297	0
markersOnly	057-058.tiff	0	21	11	45.5747	86.762	0
markersOnly	079-080.tiff	0	20	10	47.6859	86.8888	0
markersOnly	081-082.tiff	0	29	12	43.0283	113.692	0
markersOnly	083-084.tiff	0	17	14	51.1351	62.2736	0
markersOnly	085-086.tiff	0	17	12	39.5315	54.1288	0
markersOnly	099-100.tiff	0	25	11	54.7825	118.69	0
markersOnly	105-106.tiff	0	25	14	54.3119	108.584	0
markersOnly	107-108.tiff	0	25	11	41.1625	101.143	0
markersOnly	111-112.tiff	0	37	10	45.2676	147.985	0
qy78	005-006.tiff	5	7	11	40.9521	26.2902	18.7456
qy78	011-012.tiff	3	5	7	29.967	20.0307	13.8454
qy78	013-014.tiff	0	15	8	29.2527	60.3115	0
qy78	015-016.tiff	5	5	9	39.5523	21.888	21.5912
qy78	017-018.tiff	7	4	10	35.7898	14.3006	24.9682
qy78	019-020.tiff	0	11	9	36.8241	43.3971	0
qy78	021-022.tiff	0	16	8	33.1776	58.2118	0
qy78	027-028.tiff	0	11	9	32.1975	38.835	0
qy78	037-038.tiff	1	9	9	37.8118	37.8118	6.4737
qy78	039-040.tiff	5	7	11	38.2147	23.9844	18.8179
qy78	049-050.tiff	4	9	12	46.0869	33.7627	17.6465
qy78	059-060.tiff	0	16	10	38.908	60.0856	0
qy78	061-062.tiff	2	8	9	33.7698	29.7365	7.99151
qy78	063-064.tiff	0	15	12	44.1883	56.458	0
qy78	065-066.tiff	2	11	12	42.1305	38.6515	6.83161
qy78	067-068.tiff	0	12	10	38.0695	45.512	0
qy78	069-070.tiff	5	8	12	41.4612	28.9976	15.9106
qy78	071-072.tiff	0	15	11	40.8614	57.731	0
qy78	073-074.tiff	6	3	8	33.9785	12.2064	26.3439
qy78	075-076.tiff	2	10	11	40.6405	36.296	7.75518
qy78	087-088.tiff	10	4	13	49.9833	14.543	39.8315
qy78	089-090.tiff	0	14	13	55.0803	59.4479	0
markersOnly	003-004.tiff	0	35	13	49.6499	139.607	0
markersOnly	019-020.tiff	0	24	12	44.564	87.867	0
markersOnly	029-030.tiff	0	20	11	45.0692	83.9786	0
markersOnly	041-042.tiff	0	26	9	36.5844	107.077	0
markersOnly	051-052.tiff	0	21	12	48.7197	83.3632	0
markersOnly	053-054.tiff	0	27	12	50.7631	110.574	0
markersOnly	055-056.tiff	0	24	8	37.3627	102.145	0
markersOnly	063-064.tiff	0	25	13	45.5673	92.9772	0
markersOnly	069-070.tiff	0	20	13	51.5399	78.1312	0
markersOnly	085-086.tiff	0	24	11	43.1873	96.0049	0
markersOnly	093-094.tiff	0	27	11	46.3972	120.811	0
markersOnly	099-100.tiff	0	18	11	45.83	80.0084	0
markersOnly	101-102.tiff	0	18	13	53.4262	73.4721	0
markersOnly	105-106.tiff	0	16	14	49.0575	58.5462	0
markersOnly	107-108.tiff	0	18	11	44.0708	72.2165	0
markersOnly	109-110.tiff	1	13	13	49.5999	49.5999	3.73984
markersOnly	111-112.tiff	0	23	10	42.3097	94.2633	0
markersOnly	113-114.tiff	0	24	13	52.081	99.695	0
qy78	001-002.tiff	0	25	11	46.3108	104.18	0
qy78	023-024.tiff	3	9	11	47.3475	37.2562	15.9957
qy78	025-026.tiff	0	28	11	42.031	113.546	0
qy78	027-028.tiff	0	19	14	46.8373	68.1536	0
qy78	035-036.tiff	0	13	11	38.3957	45.4485	0
qy78	043-044.tiff	0	20	12	46.42	76.1556	0
qy78	045-046.tiff	1	7	7	24.3588	24.3588	3.77426
qy78	047-048.tiff	1	11	11	49.0504	49.0504	4.39139
qy78	057-058.tiff	0	33	12	52.7979	140.341	0
qy78	071-072.tiff	4	7	10	35.133	24.9663	13.3395
qy78	073-074.tiff	4	8	11	40.5756	29.6733	14.8631
qy78	075-076.tiff	3	8	10	36.9137	28.2907	12.1567
qy78	077-078.tiff	1	9	9	36.4829	36.4829	5.03697
qy78	079-080.tiff	0	24	12	44.7336	90.6548	0
qy78	081-082.tiff	0	13	9	37.1505	55.2331	0
qy78	083-084.tiff	4	10	13	47.7723	37.0664	14.4705
qy78	087-088.tiff	2	10	11	40.7147	37.1418	6.98286
qy78	089-090.tiff	7	5	11	39.0947	16.4723	26.2184
qy78	091-092.tiff	3	10	12	43.9833	36.1659	11.6904
qy78	095-096.tiff	2	11	12	45.6579	41.9836	6.55286
qy78	097-098.tiff	5	8	12	43.8119	29.3984	18.0524
qy78	103-104.tiff	7	5	11	46.2617	21.3885	30.0534
markersOnly	009-010.tiff	0	32	13	54.4349	125.995	0
markersOnly	011-012.tiff	0	33	13	47.8459	125.405	0
markersOnly	023-024.tiff	3	9	11	40.211	31.1597	13.4543
markersOnly	025-026.tiff	0	27	13	53.8981	109.988	0
markersOnly	027-028.tiff	0	17	13	52.2697	67.2575	0
markersOnly	029-030.tiff	0	20	15	57.0157	79.6107	0
markersOnly	031-032.tiff	0	24	14	46.7703	86.8752	0
markersOnly	033-034.tiff	0	23	14	47.7644	81.7441	0
markersOnly	035-036.tiff	0	21	14	54.6261	86.2085	0
markersOnly	039-040.tiff	1	9	9	35.6311	35.6311	3.29343
markersOnly	043-044.tiff	0	28	11	48.6959	120.068	0
markersOnly	053-054.tiff	0	20	11	39.4648	76.2274	0
markersOnly	073-074.tiff	0	17	12	51.8981	73.6537	0
markersOnly	079-080.tiff	0	15	11	43.1959	58.2604	0
markersOnly	099-100.tiff	0	23	10	41.099	90.9556	0
markersOnly	107-108.tiff	0	18	9	37.135	68.3741	0
markersOnly	109-110.tiff	0	30	13	50.1325	127.248	0
markersOnly	111-112.tiff	0	17	11	39.2836	65.0965	0
markersOnly	113-114.tiff	0	26	9	33.4695	103.505	0
markersOnly	115-116.tiff	0	36	11	39.9913	141.391	0
markersOnly	117-118.tiff	0	20	9	42.9211	87.2581	0
qy78	001-002.tiff	6	5	10	34.7691	18.9084	20.5296
qy78	003-004.tiff	9	3	11	40.8727	11.3136	33.574
qy78	005-006.tiff	2	12	13	48.0075	43.7478	8.72107
qy78	015-016.tiff	6	8	13	44.0036	26.6498	20.9803
qy78	017-018.tiff	0	16	12	43.308	58.5995	0
qy78	019-020.tiff	10	4	13	47.821	16.2036	34.9877
qy78	021-022.tiff	3	11	13	46.9844	40.8362	9.20331
qy78	041-042.tiff	5	9	13	47.1528	30.9881	19.3584
qy78	047-048.tiff	5	7	11	44.0122	28.3696	19.4646
qy78	049-050.tiff	11	2	12	41.7987	8.04555	37.768
qy78	051-052.tiff	0	15	11	40.0873	56.6683	0
qy78	069-070.tiff	4	9	12	42.6382	31.8382	13.9547
qy78	071-072.tiff	15	2	16	71.7642	7.16556	68.6033
qy78	075-076.tiff	1	9	9	34.8417	34.8417	3.81718
qy78	077-078.tiff	1	13	13	46.4038	46.4038	2.94653
qy78	089-090.tiff	10	3	12	44.7223	9.96258	38.0208
qy78	091-092.tiff	6	6	11	41.5849	20.0367	25.1148
qy78	093-094.tiff	9	2	10	38.0246	8.81758	34.0279
qy78	097-098.tiff	6	4	9	33.8594	15.6608	21.9667
qy78	101-102.tiff	3	8	10	35.0703	27.1876	11.8859
qy78	103-104.tiff	0	18	10	33.8261	61.426	0
qy78	105-106.tiff	8	7	14	47.9682	21.9959	28.8871
markersOnly	001-002.tiff	0	17	11	52.5737	77.7688	0
markersOnly	011-012.tiff	0	17	14	59.1236	73.189	0
markersOnly	015-016.tiff	0	16	12	53.5897	71.2145	0
markersOnly	019-020.tiff	0	14	10	47.3702	63.346	0
markersOnly	041-042.tiff	3	8	10	43.0639	36.0571	11.6891
markersOnly	047-048.tiff	0	23	12	53.7295	109.342	0
markersOnly	059-060.tiff	0	15	14	59.404	62.5712	0
markersOnly	061-062.tiff	0	25	12	53.2193	110.154	0
markersOnly	063-064.tiff	6	9	14	72.5255	46.1442	30.6326
markersOnly	067-068.tiff	0	19	14	61.2197	80.9957	0
markersOnly	069-070.tiff	0	13	11	46.1175	58.3798	0
markersOnly	073-074.tiff	2	10	11	49.5357	44.6133	10.4883
markersOnly	075-076.tiff	0	18	12	55.2741	80.5936	0
markersOnly	077-078.tiff	0	23	11	48.9656	99.0107	0
markersOnly	079-080.tiff	2	11	12	46.9511	43.269	6.65817
markersOnly	083-084.tiff	0	17	12	49.9882	70.2471	0
markersOnly	085-086.tiff	0	21	11	55.3917	95.1106	0
markersOnly	089-090.tiff	0	17	15	58.6207	67.7421	0
markersOnly	095-096.tiff	3	11	13	57.554	49.7309	12.261
markersOnly	103-104.tiff	0	22	11	46.6714	90.0298	0
markersOnly	105-106.tiff	0	23	13	62.3972	111.207	0
markersOnly	107-108.tiff	0	14	11	51.9878	65.5543	0
qy78tn2031	005-006.tiff	0	15	12	50.082	66.3927	0
qy78tn2031	013-014.tiff	0	15	14	61.944	67.7093	0
qy78tn2031	017-018.tiff	0	17	12	47.3476	71.1763	0
qy78tn2031	025-026.tiff	0	23	12	49.5665	92.2955	0
qy78tn2031	027-028.tiff	0	23	12	56.6047	110.256	0
qy78tn2031	035-036.tiff	0	13	11	45.2839	54.7224	0
qy78tn2031	037-038.tiff	0	9	8	38.3762	42.0179	0
qy78tn2031	043-044.tiff	0	20	9	48.9791	93.285	0
qy78tn2031	055-056.tiff	0	11	10	41.1016	46.4812	0
qy78tn2031	065-066.tiff	0	18	12	44.1796	68.9935	0
qy78tn2031	087-088.tiff	0	19	11	44.4721	75.8801	0
qy78tn2031	091-092.tiff	0	14	13	55.6135	60.4979	0
qy78tn2031	093-094.tiff	0	12	11	53.0733	57.8249	0
qy78tn2031	097-098.tiff	0	12	10	45.5254	55.6663	0
qy78tn2031	099-100.tiff	0	17	15	65.3115	71.9868	0
qy78tn2031	101-102.tiff	1	12	12	54.7789	54.7789	4.20747
qy78tn2031	109-110.tiff	0	25	10	39.4274	105.692	0
qy78tn2031	111-112.tiff	0	18	16	61.5712	70.3094	0
qy78tn2031	113-114.tiff	0	13	9	43.9816	66.26	0
qy78tn2031	115-116.tiff	0	16	11	53.3387	74.7197	0
qy78tn2031	117-118.tiff	0	15	13	52.1045	61.394	0
markersOnly	001-002.tiff	0	20	12	61.7061	99.013	0
markersOnly	003-004.tiff	0	30	15	57.7176	124.32	0
markersOnly	009-010.tiff	0	28	13	52.6723	115.306	0
markersOnly	017-018.tiff	0	14	9	43.1319	63.7153	0
markersOnly	019-020.tiff	0	16	13	47.9205	60.4049	0
markersOnly	027-028.tiff	0	19	14	57.6578	81.9329	0
markersOnly	053-054.tiff	1	13	13	60.0278	60.0278	4.18867
markersOnly	071-072.tiff	0	18	11	42.5225	74.1748	0
markersOnly	073-074.tiff	0	28	12	54.9711	122.659	0
markersOnly	075-076.tiff	0	38	12	52.8697	171.387	0
markersOnly	085-086.tiff	0	21	14	54.0109	81.2666	0
markersOnly	087-088.tiff	0	25	12	54.8992	112.365	0
markersOnly	091-092.tiff	0	29	11	51.0055	129.68	0
markersOnly	099-100.tiff	0	20	16	62.5156	81.7949	0
markersOnly	101-102.tiff	0	26	11	45.3979	115.452	0
markersOnly	103-104.tiff	0	14	11	50.9203	61.5411	0
markersOnly	109-110.tiff	0	21	10	55.2861	109.014	0
markersOnly	111-112.tiff	0	18	12	53.3421	76.0727	0
markersOnly	113-114.tiff	0	24	12	55.2396	110.619	0
markersOnly	115-116.tiff	0	21	13	58.097	93.2707	0
qy78tn2031	005-006.tiff	0	24	16	62.0474	92.7876	0
qy78tn2031	007-008.tiff	0	25	9	41.2151	114.078	0
qy78tn2031	021-022.tiff	1	11	11	48.5967	48.5967	3.95119
qy78tn2031	023-024.tiff	0	24	10	52.5846	132.226	0
qy78tn2031	029-030.tiff	3	10	12	47.7371	40.6867	10.6413
qy78tn2031	035-036.tiff	0	39	13	61.1965	187.557	0
qy78tn2031	037-038.tiff	0	15	9	42.9733	71.9451	0
qy78tn2031	039-040.tiff	0	18	9	40.6472	80.5628	0
qy78tn2031	041-042.tiff	0	29	12	51.064	127.975	0
qy78tn2031	043-044.tiff	0	22	12	55.2411	99.8018	0
qy78tn2031	045-046.tiff	0	34	9	41.8116	153.604	0
qy78tn2031	047-048.tiff	1	13	13	57.399	57.399	4.20117
qy78tn2031	061-062.tiff	0	14	11	46.4368	58.9851	0
qy78tn2031	069-070.tiff	0	28	14	54.0003	118.313	0
qy78tn2031	081-082.tiff	0	23	11	48.7702	101.921	0
qy78tn2031	083-084.tiff	1	13	13	57.1858	57.1858	5.3572
qy78tn2031	089-090.tiff	0	27	11	47.8207	130.023	0
qy78tn2031	093-094.tiff	0	22	17	61.015	89.0363	0
qy78tn2031	095-096.tiff	0	25	11	50.0919	114.255	0
qy78tn2031	097-098.tiff	2	9	10	43.3397	39.7057	7.72562
qy78tn2031	105-106.tiff	0	20	13	50.4283	79.386	0
qy78tn2031	107-108.tiff	0	29	13	54.3275	125.102	0
markersOnly	001-002.tiff	0	15	11	52.5568	70.394	0
markersOnly	007-008.tiff	0	36	11	52.5344	178.871	0
markersOnly	015-016.tiff	0	14	12	48.2391	56.2681	0
markersOnly	017-018.tiff	0	24	12	53.1787	108.7	0
markersOnly	025-026.tiff	0	18	10	45.6859	83.4577	0
markersOnly	027-028.tiff	0	23	14	56.4037	96.4736	0
markersOnly	031-032.tiff	0	13	10	45.565	57.452	0
markersOnly	037-038.tiff	4	10	13	50.0732	39.5693	17.7124
markersOnly	039-040.tiff	0	16	9	39.3378	69.4906	0
markersOnly	053-054.tiff	0	21	13	60.9674	95.1903	0
markersOnly	069-070.tiff	0	14	12	56.9735	66.1605	0
markersOnly	081-082.tiff	4	12	15	63.0655	50.0551	16.9372
markersOnly	089-090.tiff	0	17	11	44.7153	68.7838	0
markersOnly	099-100.tiff	1	13	13	56.2751	56.2751	5.83849
markersOnly	101-102.tiff	0	18	13	52.4389	77.5101	0
markersOnly	107-108.tiff	0	20	13	55.3547	83.0438	0
markersOnly	109-110.tiff	0	19	8	41.414	90.3497	0
markersOnly	111-112.tiff	0	20	10	49.2425	94.7921	0
markersOnly	113-114.tiff	0	29	13	53.6689	126.023	0
markersOnly	115-116.tiff	0	20	11	52.2885	89.6121	0
qy78tn2031	013-014.tiff	0	13	10	51.4364	62.8263	0
qy78tn2031	023-024.tiff	0	22	12	54.0002	99.4644	0
qy78tn2031	033-034.tiff	0	12	10	44.3599	53.723	0
qy78tn2031	047-048.tiff	0	13	12	51.699	56.8577	0
qy78tn2031	049-050.tiff	0	22	7	30.8037	106.399	0
qy78tn2031	055-056.tiff	0	24	13	46.6378	99.7121	0
qy78tn2031	057-058.tiff	0	23	11	47.7833	102.363	0
qy78tn2031	061-062.tiff	0	17	11	46.1976	74.082	0
qy78tn2031	063-064.tiff	0	15	9	39.3185	67.7856	0
qy78tn2031	065-066.tiff	0	17	12	46.7911	68.4104	0
qy78tn2031	067-068.tiff	0	19	10	44.965	91.0113	0
qy78tn2031	073-074.tiff	3	9	11	50.4221	43.0789	11.9797
qy78tn2031	075-076.tiff	0	22	14	54.4271	88.6697	0
qy78tn2031	077-078.tiff	0	15	8	34.9372	65.5452	0
qy78tn2031	083-084.tiff	0	13	11	48.6838	58.9071	0
qy78tn2031	085-086.tiff	0	15	10	49.4501	72.5727	0
qy78tn2031	087-088.tiff	0	15	12	49.6298	63.6826	0
qy78tn2031	095-096.tiff	2	9	10	43.9611	40.5072	7.5869
qy78tn2031	097-098.tiff	0	20	11	51.8328	92.9691	0
qy78tn2031	103-104.tiff	0	16	14	59.2311	68.3282	0
qy78tn2031	105-106.tiff	0	17	12	47.3726	72.8466	0
markersOnly	001-002.tiff	0	19	14	57.0379	79.1104	0
markersOnly	025-026.tiff	5	8	12	49.7036	34.2956	19.4568
markersOnly	037-038.tiff	0	22	15	57.492	86.8991	0
markersOnly	045-046.tiff	0	16	13	58.9723	72.1875	0
markersOnly	047-048.tiff	0	19	12	53.631	90.7374	0
markersOnly	057-058.tiff	5	8	12	50.1877	34.5307	19.4162
markersOnly	075-076.tiff	0	17	11	52.3566	80.8366	0
markersOnly	087-088.tiff	0	17	14	55.6959	68.786	0
markersOnly	089-090.tiff	0	22	15	58.9135	86.785	0
markersOnly	091-092.tiff	0	20	14	53.1935	77.1516	0
markersOnly	095-096.tiff	6	8	13	50.6924	31.8625	23.6011
markersOnly	097-098.tiff	0	26	14	62.7395	122.944	0
markersOnly	099-100.tiff	0	18	11	49.4547	76.9062	0
markersOnly	101-102.tiff	1	12	12	49.5866	49.5866	3.4471
markersOnly	103-104.tiff	0	17	12	53.0432	71.2301	0
markersOnly	111-112.tiff	0	28	11	44.1106	115.658	0
markersOnly	113-114.tiff	0	17	13	54.9121	72.6456	0
markersOnly	115-116.tiff	0	16	11	37.8825	59.589	0
markersOnly	117-118.tiff	2	11	12	47.7694	43.6678	8.16723
markersOnly	119-120.tiff	1	10	10	48.1864	48.1864	5.17696
qy78tn2031	007-008.tiff	0	21	12	51.3246	93.5409	0
qy78tn2031	011-012.tiff	0	19	14	55.7022	80.5795	0
qy78tn2031	015-016.tiff	0	18	12	50.9974	76.9981	0
qy78tn2031	017-018.tiff	5	9	13	56.1018	36.9552	22.823
qy78tn2031	019-020.tiff	0	21	11	44.0918	89.1916	0
qy78tn2031	021-022.tiff	0	16	10	44.9401	75.6632	0
qy78tn2031	023-024.tiff	0	14	12	51.7511	59.3375	0
qy78tn2031	033-034.tiff	3	10	12	50.522	41.7777	12.1055
qy78tn2031	039-040.tiff	1	10	10	41.7032	41.7032	4.74795
qy78tn2031	041-042.tiff	0	18	9	35.66	71.6693	0
qy78tn2031	043-044.tiff	0	24	10	43.6532	104.854	0
qy78tn2031	049-050.tiff	0	16	10	43.8211	70.4654	0
qy78tn2031	051-052.tiff	2	9	10	47.0568	42.9453	9.22754
qy78tn2031	059-060.tiff	0	16	7	35.1277	78.6043	0
qy78tn2031	061-062.tiff	0	15	11	48.7909	65.1922	0
qy78tn2031	063-064.tiff	0	20	11	49.9664	91.1038	0
qy78tn2031	065-066.tiff	0	18	11	46.422	79.9537	0
qy78tn2031	073-074.tiff	0	15	9	36.6915	63.9313	0
qy78tn2031	079-080.tiff	5	7	11	48.6436	31.9378	21.774
qy78tn2031	083-084.tiff	0	18	11	43.8373	72.5155	0
qy78tn2031	085-086.tiff	0	16	13	49.7947	60.4017	0
qy78tn2031	093-094.tiff	0	11	10	46.6308	51.1364	0
markersOnly	005-006.tiff	0	19	12	52.09	83.2197	0
markersOnly	007-008.tiff	0	15	14	64.4411	69.948	0
markersOnly	019-020.tiff	0	14	12	53.4839	63.7006	0
markersOnly	021-022.tiff	0	15	13	67.3921	76.999	0
markersOnly	027-028.tiff	0	18	15	72.3867	85.7481	0
markersOnly	029-030.tiff	0	17	12	59.3411	84.7277	0
markersOnly	039-040.tiff	0	17	12	54.8675	78.8608	0
markersOnly	041-042.tiff	0	29	13	71.6508	152.782	0
markersOnly	049-050.tiff	0	18	8	43.4256	95.6192	0
markersOnly	055-056.tiff	3	9	11	48.6344	39.843	12.7348
markersOnly	089-090.tiff	0	22	9	42.8972	115.25	0
markersOnly	091-092.tiff	0	19	14	64.714	86.0571	0
markersOnly	101-102.tiff	0	13	11	51.8305	60.7086	0
markersOnly	103-104.tiff	0	13	9	41.3855	58.2893	0
markersOnly	107-108.tiff	0	24	14	60.8644	102.733	0
markersOnly	109-110.tiff	0	13	10	48.8925	64.2009	0
markersOnly	111-112.tiff	0	23	9	44.2187	108.914	0
markersOnly	113-114.tiff	0	19	7	31.8351	80.1158	0
markersOnly	115-116.tiff	0	20	13	53.8061	88.353	0
markersOnly	117-118.tiff	0	21	12	49.0644	87.2194	0
tn2034	001-002.tiff	0	33	11	55.0609	161.389	0
tn2034	003-004.tiff	0	17	13	69.6033	88.9352	0
tn2034	009-010.tiff	0	13	10	47.2663	59.2948	0
tn2034	013-014.tiff	0	15	10	45.0012	70.7626	0
tn2034	017-018.tiff	0	16	11	50.6582	69.9869	0
tn2034	023-024.tiff	0	18	12	59.6028	87.2424	0
tn2034	033-034.tiff	0	14	9	44.0045	63.1092	0
tn2034	035-036.tiff	0	19	14	61.4193	86.4133	0
tn2034	047-048.tiff	0	27	10	50.4761	122.341	0
tn2034	053-054.tiff	0	33	11	49.7125	155.486	0
tn2034	059-060.tiff	0	21	12	52.9493	93.6864	0
tn2034	061-062.tiff	0	15	13	55.4138	64.309	0
tn2034	063-064.tiff	0	15	9	48.3747	72.9009	0
tn2034	067-068.tiff	0	12	9	42.9834	57.8205	0
tn2034	069-070.tiff	0	20	12	44.7476	75.3244	0
tn2034	071-072.tiff	0	18	11	54.7192	89.3465	0
tn2034	075-076.tiff	0	15	11	48.4795	66.5695	0
tn2034	085-086.tiff	2	11	12	53.5637	50.4971	7.98779
tn2034	095-096.tiff	0	20	13	55.2693	84.717	0
tn2034	099-100.tiff	3	8	10	45.3376	37.2622	11.6172
tn2034	105-106.tiff	0	14	11	55.0679	67.9109	0
markersOnly	001-002.tiff	0	12	10	51.8435	61.6192	0
markersOnly	003-004.tiff	4	10	13	67.5823	50.0748	23.231
markersOnly	007-008.tiff	0	18	13	51.6999	73.2424	0
markersOnly	011-012-1.tiff	0	37	12	56.3978	170.737	0
markersOnly	011-012.tiff	10	5	14	57.1482	21.1425	39.7434
markersOnly	029-030.tiff	5	9	13	50.3956	38.7163	15.9527
markersOnly	031-032.tiff	0	17	14	69.3914	83.0743	0
markersOnly	035-036.tiff	0	23	11	54.0707	104.219	0
markersOnly	037-038.tiff	0	23	13	56.2725	93.118	0
markersOnly	045-046.tiff	0	22	13	69.6703	114.17	0
markersOnly	051-052.tiff	0	9	8	39.2836	44.5195	0
markersOnly	059-060.tiff	0	26	15	67.1929	115.162	0
markersOnly	069-070.tiff	5	7	11	55.5843	37.4033	22.9049
markersOnly	071-072.tiff	3	9	11	56.4561	28.6788	0
markersOnly	073-074.tiff	0	18	12	48.6926	75.6841	0
markersOnly	091-092.tiff	0	23	14	62.0355	95.4949	0
markersOnly	093-094.tiff	0	23	12	54.0245	102.159	0
markersOnly	101-102.tiff	0	26	11	45.3053	111.534	0
markersOnly	107-108.tiff	1	12	12	43.9132	43.9132	4.0437
markersOnly	109-110.tiff	0	22	12	48.115	91.7224	0
tn2034	005-006.tiff	0	16	9	42.9074	75.9516	0
tn2034	009-010-1.tiff	0	23	15	62.6145	99.8476	0
tn2034	009-010.tiff	1	15	15	66.3402	66.3402	5.02412
tn2034	013-014.tiff	0	16	13	55.2907	71.9802	0
tn2034	023-024.tiff	0	26	16	48.496	95.1996	0
tn2034	039-040.tiff	0	19	10	45.3925	84.1721	0
tn2034	041-042.tiff	0	31	14	59.7495	135.417	0
tn2034	053-054.tiff	0	13	11	51.6352	64.5377	0
tn2034	055-056.tiff	0	16	12	58.0936	74.2644	0
tn2034	061-062.tiff	0	22	13	48.2086	85.8922	0
tn2034	063-064.tiff	0	13	11	45.2329	54.7303	0
tn2034	067-068.tiff	3	11	13	57.6283	48.2499	13.5871
tn2034	083-084.tiff	7	6	12	49.226	26.3083	27.0257
tn2034	085-086.tiff	0	13	8	39.6332	62.1952	0
tn2034	089-090.tiff	0	18	11	48.6698	78.1612	0
tn2034	095-096.tiff	0	21	13	55.8748	94.7498	0
tn2034	097-098.tiff	0	27	14	57.4778	112.302	0
tn2034	099-100.tiff	0	12	11	40.5364	44.0036	0
tn2034	103-104.tiff	0	30	13	54.9658	131.867	0
tn2034	105-106.tiff	0	19	10	46.5151	77.7697	0
tn2034	111-112.tiff	0	19	14	60.1383	85.0137	0
tn2034	113-114.tiff	0	31	12	48.9226	125.918	0
markersOnly	005-006.tiff	0	20	11	50.9316	101.51	0
markersOnly	011-012.tiff	0	20	13	59.2849	89.381	0
markersOnly	021-022.tiff	0	17	11	52.0567	78.6764	0
markersOnly	025-026.tiff	2	10	11	48.369	45.0195	7.68219
markersOnly	035-036.tiff	0	20	11	49.9009	90.5692	0
markersOnly	079-080.tiff	0	18	11	55.0606	87.6129	0
markersOnly	087-088.tiff	0	21	12	58.4174	103.516	0
markersOnly	091-092.tiff	0	20	11	55.58	98.368	0
markersOnly	093-094.tiff	0	25	9	45.0975	115.616	0
markersOnly	095-096.tiff	0	39	14	59.7879	178.344	0
markersOnly	097-098.tiff	2	12	13	61.9205	58.2941	8.74363
markersOnly	099-100.tiff	0	11	8	34.8952	47.3752	0
markersOnly	101-102.tiff	0	21	15	63.8506	91.112	0
markersOnly	105-106.tiff	0	18	11	54.6045	83.7671	0
markersOnly	107-108.tiff	0	24	13	60.0308	112.916	0
markersOnly	109-110.tiff	0	17	13	59.0584	79.52	0
markersOnly	111-112.tiff	0	20	13	59.9684	91.1272	0
markersOnly	113-114.tiff	6	11	16	63.5518	43.6169	25.1552
markersOnly	115-116.tiff	1	12	12	63.9436	63.9436	4.55274
markersOnly	117-118.tiff	0	32	12	57.7649	150.955	0
markersOnly	119-120.tiff	0	13	12	60.2575	66.0399	0
tn2034	003-004.tiff	0	11	9	38.5803	48.4281	0
tn2034	013-014.tiff	0	18	14	60.3679	76.1006	0
tn2034	015-016.tiff	0	28	12	55.6988	135.151	0
tn2034	019-020.tiff	0	20	12	54.9449	92.4293	0
tn2034	023-024.tiff	2	12	13	50.461	46.4073	8.72136
tn2034	031-032.tiff	0	27	11	46.6618	113.556	0
tn2034	033-034.tiff	0	24	10	47.0317	116.594	0
tn2034	043-044.tiff	0	34	10	43.958	154.28	0
tn2034	045-046.tiff	0	22	14	63.0083	99.6049	0
tn2034	047-048.tiff	0	50	10	39.8633	220.445	0
tn2034	049-050.tiff	0	30	11	47.9933	130.077	0
tn2034	053-054.tiff	0	21	14	62.5795	98.0065	0
tn2034	055-056.tiff	0	17	13	54.9936	79.0526	0
tn2034	057-058.tiff	0	25	13	62.2849	119.579	0
tn2034	059-060.tiff	0	16	9	47.2958	77.1703	0
tn2034	061-062.tiff	0	22	11	44.406	89.8558	0
tn2034	063-064.tiff	0	34	14	57.7478	145.318	0
tn2034	065-066.tiff	0	27	11	44.3635	112.214	0
tn2034	067-068.tiff	0	19	13	54.1885	79.5568	0
tn2034	069-070.tiff	0	23	10	43.8302	106.122	0
tn2034	071-072.tiff	0	28	14	53.3501	117.374	0
tn2034	073-074.tiff	0	15	12	54.2094	67.0029	0
tn2034	103-104.tiff	0	16	9	44.3566	77.4616	0
markersOnly	007-008.tiff	0	27	12	49.8973	119.149	0
markersOnly	009-010.tiff	0	17	10	53.9471	85.5994	0
markersOnly	021-022.tiff	1	13	13	58.6389	58.6389	5.13876
markersOnly	027-028.tiff	1	13	13	55.5536	55.5536	4.35517
markersOnly	043-044.tiff	1	12	12	58.0673	58.0673	4.39272
markersOnly	045-046.tiff	0	25	13	61.5849	118.144	0
markersOnly	055-056.tiff	0	18	12	47.5924	70.9602	0
markersOnly	057-058.tiff	0	21	14	61.6042	88.8149	0
markersOnly	063-064.tiff	0	17	11	50.5799	74.144	0
markersOnly	069-070.tiff	0	21	12	56.4356	95.6659	0
markersOnly	093-094.tiff	0	14	10	43.3546	58.6829	0
markersOnly	097-098.tiff	0	16	10	47.8133	78.3218	0
markersOnly	099-100.tiff	0	45	14	56.7458	209.206	0
markersOnly	101-102.tiff	0	22	12	54.5597	99.85	0
markersOnly	103-104.tiff	0	18	7	33.9926	81.8941	0
markersOnly	109-110.tiff	0	30	11	46.2609	137.283	0
markersOnly	111-112.tiff	0	23	10	43.0729	103.879	0
markersOnly	113-114.tiff	0	14	9	46.1017	68.2016	0
markersOnly	115-116.tiff	0	16	12	46.992	63.0018	0
tn2034	001-002.tiff	0	18	12	55.5405	85.2191	0
tn2034	005-006.tiff	0	19	11	49.2919	84.6363	0
tn2034	013-014.tiff	0	31	14	59.63	135.826	0
tn2034	035-036.tiff	0	24	13	53.6453	102.545	0
tn2034	037-038.tiff	0	23	10	48.6863	109.94	0
tn2034	039-040.tiff	0	18	11	44.0527	67.9364	0
tn2034	041-042.tiff	3	12	14	56.4024	48.0946	11.6844
tn2034	047-048.tiff	0	22	15	58.3806	88.7311	0
tn2034	049-050.tiff	9	5	13	58.4045	22.0126	39.3075
tn2034	051-052.tiff	12	4	15	57.6308	15.1574	46.2331
tn2034	053-054.tiff	4	8	11	60.3682	44.2722	23.7836
tn2034	061-062.tiff	0	25	9	39.8117	108.392	0
tn2034	071-072.tiff	0	16	14	57.8767	65.568	0
tn2034	073-074.tiff	0	20	12	50.975	83.2714	0
tn2034	075-076.tiff	0	23	13	50.8397	90.9835	0
tn2034	077-078.tiff	0	18	13	52.2962	76.4758	0
tn2034	079-080.tiff	1	12	12	56.8319	56.8319	5.12856
tn2034	085-086.tiff	2	13	14	56.0768	51.5871	9.07933
tn2034	087-088.tiff	0	23	16	63.3791	93.3924	0
tn2034	095-096.tiff	0	25	13	57.2895	112.11	0
tn2034	105-106.tiff	0	22	11	45.5433	97.9634	0
tn2034	107-108.tiff	0	17	10	44.0909	72.781	0
