# Supplementary material for: Innexin function dictates the spatial relationship between distal somatic cells in the Caenorhabditis elegans gonad without impacting the germline stem cell pool
Source: eLife. 2022 Sep 13;11:e74955. doi: 10.7554/eLife.74955 (PMC9473689; doi:10.7554/eLife.74955)
Supplement: Figure 4—source data 1. [file elife-74955-fig4-data1.xlsx]

## Sheet: Sheet1
genotype	gonad	overlap	sheath	PZ	PZ_micron	sheath_micron	overlap_micron
markersOnly	003-004.tiff	6	14	19	74.6221	54.6953	25.6941
markersOnly	005-006.tiff	0	21	17	72.522	88.711	0
markersOnly	009-010.tiff	3	15	17	68.9795	60.5243	12.5823
markersOnly	015-016.tiff	0	27	24	95.6808	110.604	0
markersOnly	017-018.tiff	3	14	16	63.9439	56.6417	11.667
markersOnly	019-020.tiff	0	23	12	44.586	93.5035	0
markersOnly	021-022.tiff	0	25	21	77.6323	94.6619	0
markersOnly	023-024.tiff	0	26	22	83.4318	100.624	0
markersOnly	025-026.tiff	0	20	19	78.5398	81.8403	0
markersOnly	035-036.tiff	1	18	18	68.3232	68.3232	4.63382
markersOnly	037-038.tiff	0	30	16	68.2847	130.681	0
markersOnly	039-040.tiff	5	13	17	65.122	50.6897	18.222
markersOnly	041-042.tiff	1	16	16	63.9218	63.9218	2.697
markersOnly	051-052.tiff	0	20	17	67.4952	81.6588	0
markersOnly	053-054.tiff	0	19	15	64.1665	82.4101	0
markersOnly	055-056.tiff	3	15	17	65.2702	57.7795	10.3567
markersOnly	057-058.tiff	0	23	21	81.4684	90.1938	0
markersOnly	059-060.tiff	0	20	19	84.7024	89.8826	0
markersOnly	061-062.tiff	1	17	17	65.698	65.698	4.33672
markersOnly	063-064.tiff	6	17	22	81.2448	61.0928	23.8767
markersOnly	073-074.tiff	2	16	17	72.9295	68.02	9.69102
markersOnly	075-076.tiff	0	21	18	70.053	82.8255	0
ag17	001-002.tiff	16	1	16	64.1773	3.66951	64.1773
ag17	015-016.tiff	11	3	13	62.7951	13.244	53.7013
ag17	019-020.tiff	22	3	24	88.4874	12.492	80.4824
ag17	021-022.tiff	13	3	15	58.097	9.90432	51.7981
ag17	027-028.tiff	16	4	19	81.5832	18.3517	67.7484
ag17	031-032.tiff	15	3	17	64.8192	10.653	58.7291
ag17	033-034.tiff	16	5	20	83.6567	20.8839	67.5195
ag17	035-036.tiff	14	5	18	73.518	21.4603	55.6761
ag17	039-040.tiff	15	6	20	74.9849	25.647	53.6328
ag17	041-042.tiff	15	1	15	53.8842	2.81317	53.8842
ag17	043-044.tiff	20	4	23	85.1444	12.1299	76.0371
ag17	045-046.tiff	12	4	15	63.7068	20.1012	49.7099
ag17	047-048.tiff	19	1	19	65.5684	4.52839	65.5684
ag17	051-052.tiff	16	2	17	64.4195	8.18136	60.8011
ag17	053-054.tiff	10	4	13	55.8557	16.8951	44.4157
ag17	055-056.tiff	17	3	19	78.4676	10.2329	72.035
ag17	057-058.tiff	19	1	19	64.2955	2.4243	64.2955
ag17	059-060.tiff	14	3	16	61.4498	11.7911	53.91
ag17	061-062.tiff	12	1	12	42.6535	2.6535	42.6535
ag17	063-064.tiff	14	2	15	60.5104	10.8514	54.7431
ag17	071-072.tiff	16	3	18	83.0358	13.6926	74.6469
ag17	073-074.tiff	3	13	15	55.0572	48.0088	10.7683
ag17	075-076.tiff	13	5	17	64.4319	18.5296	49.5845
ag17	077-078.tiff	14	3	16	74.2427	11.8012	66.5196
ag17	079-080.tiff	6	11	16	65.0729	46.7859	22.6021
ag17	081-082.tiff	14	3	16	66.5171	13.2078	57.678
markersOnly	001-002.tiff	2	21	22	74.8034	71.5798	6.61604
markersOnly	007-008.tiff	0	17	12	39.7534	60.7418	0
markersOnly	015-016.tiff	0	22	20	75.8504	84.3404	0
markersOnly	017-018.tiff	0	18	17	60.2608	64.3292	0
markersOnly	019-020.tiff	0	29	17	63.8531	114.635	0
markersOnly	025-026.tiff		21	21	70.7995
markersOnly	027-028.tiff	0	18	15	64.8783	74.2563	0
markersOnly	029-030.tiff	3	15	17	61.6839	53.7552	12.6431
markersOnly	031-032.tiff	1	13	13	50.1783	50.1783	4.36348
markersOnly	035-036.tiff	0	19	17	66.4175	74.419	0
markersOnly	037-038.tiff	0	26	14	49.6309	100.052	0
markersOnly	039-040.tiff	4	13	16	64.6916	51.4972	18.217
markersOnly	041-042.tiff	0	36	19	71.67	152.752	0
markersOnly	047-048.tiff	3	17	19	77.9282	69.1116	12.7886
markersOnly	049-050.tiff	0	22	18	74.0942	89.1764	0
markersOnly	051-052.tiff	2	17	18	73.228	68.5442	8.80587
markersOnly	053-054.tiff	1	19	19	68.7341	68.7341	3.57074
markersOnly	055-056.tiff	0	21	20	80.5385	85.0746	0
markersOnly	057-058.tiff	7	13	19	75.7788	51.6269	27.2411
markersOnly	063-064.tiff	1	17	17	69.117	69.117	4.50118
markersOnly	065-066.tiff	2	13	14	49.837	46.0144	8.06649
markersOnly	079-080.tiff	0	20	18	78.4158	86.7074	0
qy78	001-002.tiff	12	3	14	57.3934	12.5501	49.5752
qy78	003-004.tiff	10	6	15	64.5735	26.2329	41.8668
qy78	005-006.tiff	8	8	15	55.8252	29.5031	29.7802
qy78	007-008.tiff	7	7	13	49.943	23.403	29.449
qy78	009-010.tiff	9	6	14	59.5551	23.8811	39.2487
qy78	011-012.tiff	9	4	12	54.4471	20.7428	39.3306
qy78	013-014.tiff	4	11	14	52.8332	40.9004	16.3808
qy78	015-016.tiff	12	6	17	69.981	21.5748	51.6863
qy78	017-018.tiff	4	14	17	69.2025	57.2631	15.6422
qy78	019-020.tiff	11	5	15	61.5356	19.3973	46.5295
qy78	021-022.tiff	0	17	14	51.1118	63.3097	0
qy78	023-024.tiff	8	9	16	61.0726	34.9598	29.2674
qy78	025-026.tiff	14	3	16	61.791	12.3719	53.5905
qy78	027-028.tiff	5	13	17	60.6874	47.1329	16.9492
qy78	029-030.tiff	0	19	13	49.8895	76.9307	0
qy78	031-032.tiff	7	5	11	41.7227	19.4059	26.5035
qy78	033-034.tiff	2	15	16	68.5014	63.6091	9.93705
qy78	035-036.tiff	8	5	12	44.4439	17.7133	29.963
qy78	037-038.tiff	10	4	13	53.9948	19.1814	39.928
qy78	039-040.tiff	0	28	16	58.5104	113.545	0
qy78	041-042.tiff	9	9	17	65.7797	31.9714	38.4134
qy78	043-044.tiff	11	3	13	52.779	11.3114	46.1847
qy78	045-046.tiff	10	7	16	61.2816	27.7478	37.8514
markersOnly	001-002.tiff	0	22	19	79.3763	93.1166	0
markersOnly	003-004.tiff	2	19	20	81.8385	77.8601	7.86958
markersOnly	005-006.tiff	0	24	19	88.4239	111.684	0
markersOnly	007-008.tiff	12	9	20	76.6033	33.4034	46.1759
markersOnly	009-010.tiff	0	28	16	65.8073	119.653	0
markersOnly	011-012.tiff	3	19	21	83.6872	76.3969	11.5815
markersOnly	013-014.tiff	5	18	22	85.0178	69.1978	19.7698
markersOnly	015-016.tiff	12	9	20	69.3589	29.9984	42.0402
markersOnly	017-018.tiff	0	22	16	59.138	83.85	0
markersOnly	019-020.tiff	4	13	16	69.5666	56.6429	18.793
markersOnly	021-022.tiff	0	29	23	92.4419	116.3	0
markersOnly	023-024.tiff	0	27	21	89.2795	117.101	0
markersOnly	025-026.tiff	4	15	18	81.9147	67.0295	19.2287
markersOnly	027-028.tiff	4	16	19	68.6701	56.3964	16.3346
markersOnly	029-030.tiff	5	16	20	84.5744	69.8116	19.4942
markersOnly	031-032.tiff	0	35	18	74.0761	154.921	0
markersOnly	033-034.tiff	0	21	18	63.462	74.5125	0
markersOnly	035-036.tiff	0	25	17	70.7951	103.374	0
markersOnly	037-038.tiff	2	22	23	73.4767	69.4836	7.43336
markersOnly	039-040.tiff	7	11	17	69.3476	44.8652	28.7976
markersOnly	041-042.tiff	6	19	24	89.1236	70.3371	22.6851
markersOnly	043-044.tiff	0	21	20	84.3509	89.6438	0
markersOnly	045-046.tiff	0	22	19	69.7794	82.8063	0
markersOnly	047-048.tiff	0	27	18	71.1565	107.816	0
markersOnly	049-050.tiff	9	10	18	63.2449	36.7346	30.847
markersOnly	051-052.tiff	13	10	22	86.3724	39.9544	51.7885
markersOnly	053-054.tiff	4	13	16	71.1187	56.7327	18.2772
markersOnly	055-056.tiff	6	13	18	71.5716	53.5114	22.4089
qy78	001-002.tiff	4	6	9	40.0091	28.1788	17.1384
qy78	003-004.tiff	2	11	12	47.4169	43.6227	7.79891
qy78	005-006.tiff	6	10	15	57.4363	40.271	22.1976
qy78	007-008.tiff	8	10	17	69.4566	38.22	35.3392
qy78	009-010.tiff	5	9	13	58.0511	41.6135	20.8011
qy78	011-012.tiff	10	6	15	51.641	20.1286	34.4329
qy78	015-016.tiff	9	4	12	46.9477	16.2627	34.4965
qy78	017-018.tiff	7	9	15	55.4111	32.9055	25.5586
qy78	019-020.tiff	10	6	15	57.3024	24.9366	36.5545
qy78	021-022.tiff	0	21	15	58.6359	83.2434	0
qy78	023-024.tiff	0	18	12	48.2725	74.5881	0
qy78	025-026.tiff	11	5	15	48.8852	13.9242	37.8137
qy78	027-028.tiff	5	12	16	57.8321	42.1453	19.7838
qy78	029-030.tiff	11	4	14	51.3989	14.388	39.4973
qy78	031-032.tiff	8	5	12	48.7796	21.8207	31.2699
qy78	033-034.tiff	7	9	15	57.9838	33.2407	28.956
qy78	035-036.tiff	13	4	16	62.0182	15.662	51.0066
qy78	037-038.tiff	7	11	17	79.5382	53.6983	31.3322
qy78	039-040.tiff	9	5	13	56.7253	19.5782	42.7129
qy78	041-042.tiff	8	5	12	52.1837	21.1894	36.0727
qy78	043-044.tiff	7	16	22	80.3362	59.0996	25.6716
qy78	045-046.tiff	4	10	13	48.1706	36.1533	16.0266
qy78	047-048.tiff	6	7	12	49.7228	28.5436	25.3462
qy78	049-050.tiff	2	16	17	61.1541	57.386	8.43847
qy78	051-052.tiff	9	6	14	53.2364	18.6539	37.9791
qy78	053-054.tiff	3	9	11	48.5297	38.644	14.6921
qy78	055-056.tiff	0	17	15	56.1106	64.4309	0
qy78	057-058.tiff	15	2	16	64.6987	9.8423	60.5618
qy78	059-060.tiff	0	19	14	55.0818	74.0196	0
qy78tn2031	001-002.tiff	3	16	18	66.3657	57.9629	12.3533
qy78tn2031	003-004.tiff	3	14	16	51.8082	43.6955	11.5109
qy78tn2031	005-006.tiff	0	30	22	80.1614	117.381	0
qy78tn2031	007-008.tiff	1	19	19	76.0663	76.0663	4.22128
qy78tn2031	009-010.tiff	10	12	21	73.6135	37.1809	40.5579
qy78tn2031	011-012.tiff	2	15	16	63.1991	59.0991	8.85169
qy78tn2031	013-014.tiff	1	17	17	63.1325	63.1325	4.48773
qy78tn2031	015-016.tiff	0	31	19	65.7746	111.619	0
qy78tn2031	017-018.tiff	0	23	18	67.7563	87.7167	0
qy78tn2031	019-020.tiff	11	8	18	67.3995	28.0498	43.0464
qy78tn2031	021-022.tiff	0	27	13	45.6271	105.984	0
qy78tn2031	023-024.tiff	11	8	18	64.6996	27.7972	40.7921
qy78tn2031	025-026.tiff	0	25	18	60.0761	91.7214	0
qy78tn2031	027-028.tiff	5	14	18	67.3184	52.991	18.1776
qy78tn2031	029-030.tiff	0	17	9	30.9595	64.7055	0
qy78tn2031	031-032.tiff	0	25	24	92.7718	96.7143	0
qy78tn2031	033-034.tiff	0	20	17	57.2191	70.1559	0
qy78tn2031	035-036.tiff	5	16	20	84.7527	66.6488	23.1905
qy78tn2031	037-038.tiff	6	16	21	76.8741	56.8892	23.2968
qy78tn2031	039-040.tiff	9	8	16	55.997	27.6536	31.4551
qy78tn2031	041-042.tiff	4	17	20	73.4648	62.1642	14.8713
qy78tn2031	043-044.tiff	3	11	13	43.5118	35.788	10.9226
qy78tn2031	045-046.tiff	0	19	16	60.7219	72.005	0
qy78tn2031	047-048.tiff	0	25	16	59.8791	103.671	0
qy78tn2031	049-050.tiff	0	31	16	64.3867	131.904	0
qy78tn2031	051-052.tiff	5	15	19	68.3909	53.9866	17.2594
qy78tn2031	053-054.tiff	3	17	19	78.8018	70.1916	12.6126
qy78tn2031	055-056.tiff	7	10	16	61.8542	40.6095	25.6717
qy78tn2031	057-058.tiff	3	19	21	77.3415	69.1654	12.29
qy78tn2031	059-060.tiff	4	16	19	74.7857	63.2026	16.3434
tn2034	001-002.tiff	3	16	18	67.0443	58.3739	13.4696
tn2034	003-004.tiff	8	13	20	72.5461	49.2371	27.7454
tn2034	005-006.tiff	11	14	24	92.4566	55.8411	42.405
tn2034	007-008.tiff	8	15	22	80.9862	53.7535	32.3829
tn2034	009-010.tiff	2	21	22	80.5055	76.1879	7.50245
tn2034	011-012.tiff	6	12	17	62.2493	42.6743	23.4673
tn2034	013-014.tiff	2	16	17	67.8621	63.5794	9.13731
tn2034	015-016-1.tiff	5	11	15	47.4355	33.8352	16.004
tn2034	015-016.tiff	0	32	19	72.906	122.359	0
tn2034	017-018.tiff	0	27	25	86.13	96.3292	0
tn2034	019-020.tiff	0	27	21	76.327	104.028	0
tn2034	021-022.tiff	0	23	16	63.7669	90.2656	0
tn2034	023-024.tiff	0	25	17	63.204	102.076	0
tn2034	025-026.tiff	8	14	21	81.9564	52.59	33.8844
tn2034	027-028.tiff	0	21	19	68.5978	78.0868	0
tn2034	029-030.tiff	7	13	19	69.8063	49.7222	23.6556
tn2034	031-032.tiff	0	36	22	80.643	143.144	0
tn2034	033-034.tiff	5	8	12	37.9193	27.2029	14.0713
tn2034	035-036.tiff	0	14	13	51.3164	56.1722	0
tn2034	037-038.tiff	0	27	20	74.415	104.316	0
tn2034	039-040.tiff	7	14	20	78.4826	54.358	27.5514
tn2034	041-042.tiff	3	19	21	76.0192	66.1895	13.3823
tn2034	043-044.tiff	3	13	15	53.742	46.7036	11.2714
tn2034	045-046.tiff	4	16	19	69.0078	58.7997	14.789
tn2034	047-048.tiff	8	16	23	89.1977	61.8016	31.3836
tn2034	049-050.tiff	9	14	22	82.8253	50.5612	35.6412
tn2034	051-052.tiff	0	19	16	59.5384	73.3905	0
tn2034	053-054.tiff	8	10	17	63.5776	37.03	30.6484
tn2034	055-056.tiff	5	10	14	52.6797	37.5123	19.3425
tn2034	057-058.tiff	5	12	16	65.0184	50.1699	18.8722
tn2034	059-060.tiff	4	16	19	74.2549	61.3314	17.5004
tn2034	061-062.tiff	5	12	16	64.5352	50.1928	18.6958
