# Supplementary material for: Innexin function dictates the spatial relationship between distal somatic cells in the Caenorhabditis elegans gonad without impacting the germline stem cell pool
Source: eLife. 2022 Sep 13;11:e74955. doi: 10.7554/eLife.74955 (PMC9473689; doi:10.7554/eLife.74955)
Supplement: Table 1—source data 1. [file elife-74955-table1-data1.xlsx]

## Sheet: Sheet1
DG5063 inx-8(qy78)			NK2571 inx-8(qy78); cpIs122 [lag-2p::mNeonGreen::plcdeltaPH]					NK2576 inx-8(qy102) inx-9(ok1502); cpIs122				DG5070 inx-14(ag17); inx-8(qy78)			DG5251 inx-8(tn2034)			DG5250 inx-8(qy78 tn2031)			DG5320 fasn-1(av138::gfp) naIs37			DG5064 inx-8(qy102) inx-9(ok1502)			DG5020 naIs37; bcIs39			DG5059 inx-9(ok1502)			N2 WT			DG5270 inx-14(ag17)			DG5367 inx-14(ag17) fasn-1(av138::gfp) naIs37				DG5380 bcIs39			DG5378 fasn-1(av138::gfp) n aIs37; inx-8(qy78)
12/30-1/3/22			12/30-1/3/22					12/31-1/3/22				1/3-1/6/22			1/3-1/6/22			1/4-1/8/22			1/11-1/14/22			1/11-1/14/22			1/11-1/14/22			1/15-/1/18/22			1/15/-1/18/22			1/19-1/22/22			1/19-1/22/22				1/20-1/23/22			1/23/-1/26/22
larvae	dead eggs	% lethality	larvae	dead eggs	% lethality			larvae	dead eggs	% lethality		larvae	dead eggs	%lethality	larvae	dead eggs	%lethality	larvae	dead eggs	%lethality	larvae	dead eggs	% lethality	larvae	dead eggs	% lethality	larvae	dead eggs	% lethality	larvae	dead eggs	%lethality	larvae	dead eggs	% lethality	larvae	dead eggs		larvae	dead eggs	% lethality		larvae	dead eggs	% lethality	larvae	dead eggs	% lethality
220	14	6	197	27	12.1			196	5	2.5		78	32	29.1	361	0	0	288	0	0	324	1	0.3	188	2	1.1	254	2	0.8	333	0	0	313	1	0.3	268	1	0.4	252	0	0		235	1	0.4	278	21	7
216	34	13.6	195	4	2			181	6	3.2		97	50	34	267	3	1.1	277	0	0	287	0	0	199	0	0	299	2	0.7	308	1	0.3	324	2	0.6	221	2	0.9	288	0	0		316	0	0	209	12	5.4
233	23	9	225	16	6.6			294	10	3.3		108	24	18.2	305	0	0	221	0	0	359	5	1.4	249	3	1.2	263	1	0.4	342	0	0	285	0	0	264	1	0.4	230	0	0		270	0	0	251	14	5.3
240	19	7.3	233	19	7.5			228	0	0		96	48	33.3	299	0	0	241	0	0	317	1	0.3	94	1	1.1	232	0	0	314	0	0	296	1	0.3	289	0	0	255	0	0		278	1	0.4	270	8	2.9
257	18	6.5	248	5	2			151	5	3.2		105	34	24.5	335	2	0.6	246	0	0	371	0	0	230	0	0	192	1	0.5	366	1	0.3	315	0	0	227	0	0	286	0	0		282	1	0.4	272	5	1.8
258	22	7.9	223	15	6.3			192	5	2.5		106	26	19.7	301	1	0.3	215	0	0	296	1	0.3	257	2	0.8	262	1	0.4	351	1	0.3	313	0	0	247	1	0.4	303	2	0.7		254	2	0.8	163	7	4.1
259	22	7.8	195	21	9.7			207	5	2.4		105	9	7.9	303	2	0.7	296	0	0	361	0	0	239	0	0	301	2	0.7	310	0	0	343	0	0	268	0	0	233	0	0		316	1	0.3	242	6	2.4
212	9	4.1	217	23	9.6			161	5	3		156	32	7.1	315	1	0.3	244	1	0.4	345	1	0.3	242	1	0.4	250	8	3.1	309	0	0	274	2	0.7	276	0	0	248	1	0.4		305	0	0	234	27	10.3
176	26	12.9	182	17	8.5			200	1	0.5		110	39	26.2	281	0	0	278	1	0.4	385	3	0.8	243	5	2	257	1	0.4	319	0	0	303	0	0	231	1	0.4	268	1	0.4		264	1	0.4	257	7	2.7
238	8	3.3	224	20	8.2			149	3	2		101	37	26.8	318	0	0	274	0	0	349	0	0	195	1	0.5	257	0	0	259	0	0	297	2	0.7	234	0	0	267	0	0		284	1	0.4	252	7	2.7
236	15	6	185	2	1.1			133	3	2.2		105	44	29.5	265	0	0	233	1	0.4	297	2	0.7	132	3	2.2	256	3	1.2	318	1	0.3	339	0	0	269	1	0.4	258	0	0		274	1	0.4	329	15	4.4
247	15	5.7	198	22	10			127	3	2.3		111	51	31.5	298	0	0	254	1	0.4	342	2	0.6	221	1	0.5	121	0	0	328	1	0.3	297	0	0	271	1	0.4	268	1	0.4		333	2	0.6	297	8	2.6
204	24	10.5	212	11	4.9			299	11	3.5		71	37	34.3	321	1	0.3	276	0	0	297	3	1	123	6	4.7	285	1	0.3	321	1	0.3	294	4	1.3	266	0	0	309	0	0		332	0	0	234	6	2.5
215	21	8.9	212	14	6.2			281	10	3.4		104	31	23	310	3	1	297	0	0	334	0	0	211	0	0	271	0	0	307	0	0	148	2	1.3	266	0	0	216	0	0		324	1	0.3	223	26	10.4
251	17	6.3	258	9	3.4			295	3	1		83	26	23.9	325	4	1.2	262	0	0	327	1	0.3	221	1	0.5	266	1	0.4	337	0	0	297	0	0	274	0	0	202	1	0.5		197	4	2	259	19	6.8
224	12	5.1	262	9	3.3			261	3	1.1		102	25	19.7	334	0	0	296	0	0	360	2	0.6	256	1	0.4	208	0	0	364	0	0	350	2	0.6	227	2	0.9	279	1	0.4		287	1	0.3	295	18	5.8
222	17	7.1	238	11	4.4			220	5	2.2		122	47	27.8	367	3	0.8	254	0	0	381	0	0	290	1	0.3	247	1	0.4	318	4	1.2	283	1	0.4	224	3	1.3	258	0	0		292	4	1.4	173	19	9.9
223	28	11.6	218	7	3.1			188	9	4.6		113	23	16.9	256	3	1.2	218	0	0	396	0	0	178	2	1.1	136	0	0	319	0	0	301	2	0.7	286	3	1	230	0	0		264	0	0	208	13	5.9
174	16	8.4	161	12	6.9			161	6	3.6		149	24	13.9	283	1	0.4	261	0	0	386	3	0.8	205	4	1.9	242	1	0.4	236	0	0	296	2	0.7	240	2	0.8	241	0	0		256	0	0	283	10	3.4
215	26	10.8	249	10	3.9			178	6	3.3		100	32	24.2	198	1	0.5	236	0	0	322	1	0.3	218	3	1.4	267	1	0.4	331	1	0.3	324	0	0	302	0	0	267	1	0.4		315	1	0.3	247	5	2
216	41	16	182	10	5.2			258	0	0		79	50	38.8	236	0	0	233	0	0	342	0	0	187	3	1.6	240	1	0.4	306	1	0.3	269	2	0.7	247	0	0	252	1	0.4		281	2	0.7	239	15	5.9
190	18	8.7	209	19	8.3			229	2	0.9		114	28	19.7	289	1	0.3	254	0	0	362	0	0	191	4	2.1	232	7	2.9	326	1	0.3	343	2	0.6	255	0	0	228	0	0		268	0	0	279	11	3.8
196	66	25.2	172	19	9.9			229	4	1.7		102	24	19	346	1	0.3	283	0	0	351	1	0.3	174	4	2.2	202	11	5.2	294	0	0	333	0	0	238	0	0	250	0	0		333	0	0	150	24	13.8
216	26	10.7	4895	322				4818	110			118	46	28	309	1	0.3	264	0	0	319	4	1.2	269	1	0.4	161	7	4.2	385	0	0	230	2	0.9	170	3	1.7	5888	9	0.156522		232	0	0	5644	303	5.29565
202	10	4.7	212.826	14	6.22174			209.478	4.78261	2.27826		130	26	16.7	319	1	0.3	298	1	0.3	349	1	0.3	265	1	0.4	5701	52	0.95	363	4	1.1	7167	27	0.408333	270	5	1.8	256	0.391304	0.227289		274	1	0.4	245.391	13.1739	3.19523
5540	547		27.4817	6.62639	3.02384			52.6945	3.01446	1.22843		2665	845	23.748	7541	29	0.384	6499	5	0.076	8559	32	0.38	5277	50	1.072	237.542	2.16667	1.4099	8064	17	0.2	298.625	1.125	0.420059	6330	26	0.432	26.5843	0.583027			7066	25	0.38	43.7438	6.91935
221.6	21.88	8.964										106.6	33.8	7.98854	301.64	1.16	0.404846	259.96	0.2	0.156205	342.36	1.28	0.408248	211.08	2	1.05614	46.5141	2.95865		322.739	0.68	0.320156	42.0856	1.1156		253.2	1.04	0.554316					282.64	1	0.470815
23.6361	11.9524	4.58784										19.3886	10.8551		37.8361	1.21381		25.8755	0.408248		30.2626	1.4		47.2396	1.65831					33.0251	1.10755					28.1025	1.33791						34.182	1.11803
